# Supplementary material for: Genome and transcriptome of the natural isopropanol producer Clostridium beijerinckii DSM6423
Source: PubMed Central journal article supplement (PMC5894183; doi:10.1186/s12864-018-4636-7), 2018-04-10

## Additional file 2

Microscopic observation of *C. beijerinckii* DSM6423 cells during glucose fermentation

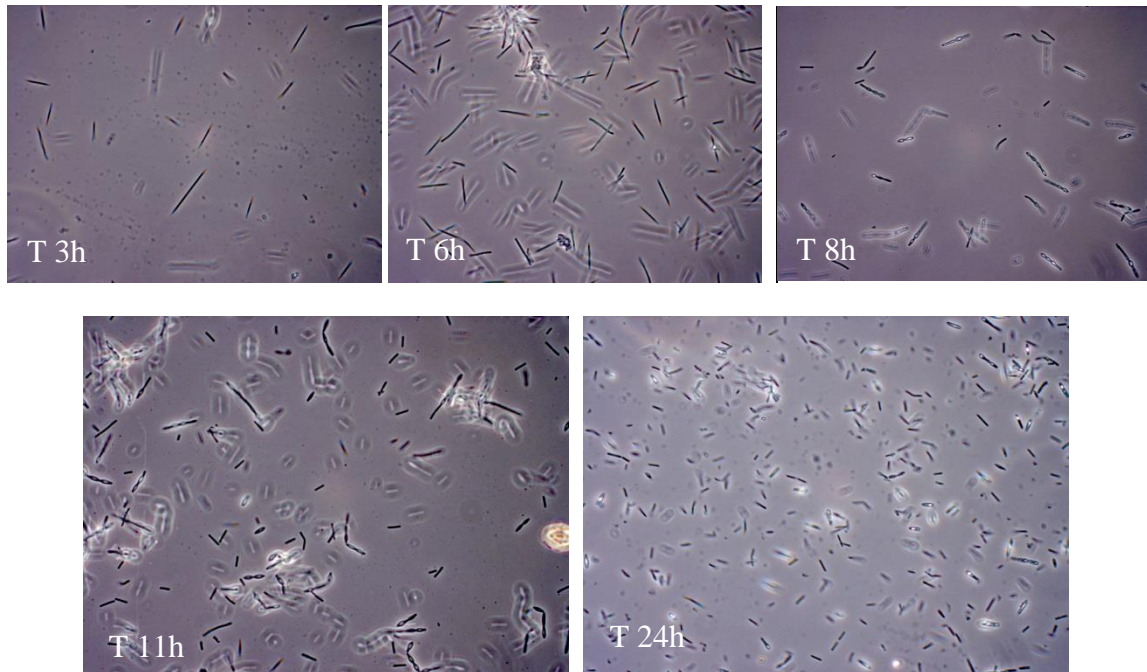

Supplement: 12864_2018_4636_MOESM2_ESM.pdf [file 12864_2018_4636_MOESM2_ESM.pdf]
