# Supplementary material for: Genome and transcriptome of the natural isopropanol producer Clostridium beijerinckii DSM6423
Source: PubMed Central journal article supplement (PMC5894183; doi:10.1186/s12864-018-4636-7), 2018-04-10
Supplement: 12864_2018_4636_MOESM4_ESM.pdf [file 12864_2018_4636_MOESM4_ESM.pdf]

**Additional file 4: List of the most highly transcribed genes during *C. beijerinckii* DSM6423 glucose fermentation at T3h**

| Rank | Gene ID   | Name  | Product                                                       | average rpkm |
|------|-----------|-------|---------------------------------------------------------------|--------------|
| 1    | CIBE_5676 | -     | putative cell wall binding repeat-containing protein          | 205.83       |
| 2    | CIBE_5631 | -     | putative cell wall binding repeat-containing protein          | 190.15       |
| 3    | CIBE_0314 | -     | conserved protein of unknown function                         | 188.91       |
| 4    | CIBE_0311 | -     | conserved protein of unknown function                         | 187.33       |
| 5    | CIBE_0312 | -     | conserved protein of unknown function                         | 167.41       |
| 6    | CIBE_5303 | -     | conserved protein of unknown function                         | 131.05       |
| 7    | CIBE_5304 | -     | conserved protein of unknown function                         | 128.91       |
| 8    | CIBE_0313 | -     | conserved protein of unknown function                         | 109.01       |
| 9    | CIBE_1020 | rpsU  | ribosomal protein S21                                         | 101.33       |
| 10   | CIBE_6108 | ssbA  | single-strand DNA-binding protein                             | 99.20        |
| 11   | CIBE_1250 | -     | Cytochrome C551                                               | 97.71        |
| 12   | CIBE_0170 | rplB  | ribosomal protein L2 (BL2)                                    | 97.04        |
| 13   | CIBE_1637 | rbr3A | Reverse rubrerythrin-1                                        | 86.31        |
| 14   | CIBE_0348 | groEL | chaperonin large subunit                                      | 84.01        |
| 15   | CIBE_0678 | -     | Ribonuclease, Rne/Rng family                                  | 81.89        |
| 16   | CIBE_4606 | eutE  | Ethanolamine utilization protein EutE                         | 79.82        |
| 17   | CIBE_6109 | rpsF  | ribosomal protein S6 (BS9)                                    | 77.39        |
| 18   | CIBE_0769 | gapA  | glyceraldehyde-3-phosphate dehydrogenase                      | 73.96        |
| 19   | CIBE_0169 | rplW  | ribosomal protein L23                                         | 71.38        |
| 20   | CIBE_4608 | yodR  | putative acyloate-acetoacetate CoA-transferase                | 71.09        |
| 21   | CIBE_0162 | rpsL  | ribosomal protein S12 (BS12)                                  | 69.39        |
| 22   | CIBE_2172 | -     | conserved protein of unknown function                         | 68.89        |
| 23   | CIBE_6132 | rpmH  | ribosomal protein L34                                         | 64.12        |
| 24   | CIBE_0061 | -     | 3D domain protein                                             | 63.37        |
| 25   | CIBE_5186 | nifJ  | Pyruvate-flavodoxin oxidoreductase                            | 63.02        |
| 26   | CIBE_3174 | rpsU  | ribosomal protein S21                                         | 62.53        |
| 27   | CIBE_0175 | rplP  | ribosomal protein L16                                         | 61.91        |
| 28   | CIBE_0195 | rpsM  | ribosomal protein S13                                         | 61.36        |
| 29   | CIBE_0168 | rplD  | ribosomal protein L4                                          | 60.49        |
| 30   | CIBE_2171 | -     | RNA polymerase, sigma 28 subunit, FliA/WhiG family            | 59.77        |
| 31   | CIBE_0347 | groES | chaperonin small subunit                                      | 59.31        |
| 32   | CIBE_0161 | rpoC  | RNA polymerase (beta' subunit)                                | 58.43        |
| 33   | CIBE_0158 | rplJ  | ribosomal protein L10 (BL5)                                   | 57.55        |
| 34   | CIBE_0177 | rpsQ  | ribosomal protein S17 (BS16)                                  | 56.19        |
| 35   | CIBE_5628 | -     | putative cell wall binding repeat-containing protein          | 54.39        |
| 36   | CIBE_1402 | -     | conserved protein of unknown function                         | 51.75        |
| 37   | CIBE_0680 | -     | conserved protein of unknown function                         | 50.29        |
| 38   | CIBE_4609 | adc   | Acetoacetate decarboxylase                                    | 50.27        |
| 39   | CIBE_0184 | rplF  | ribosomal protein L6 (BL8)                                    | 49.98        |
| 40   | CIBE_0194 | -     | protein of unknown function                                   | 48.34        |
| 41   | CIBE_0178 | rplNA | ribosomal protein L14                                         | 48.04        |
| 42   | CIBE_0339 | yngF  | putative Methylglutaconyl-CoA hydratase                       | 47.77        |
| 43   | CIBE_0340 | acdA  | acyl-CoA dehydrogenase                                        | 47.66        |
| 44   | CIBE_0174 | rpsC  | ribosomal protein S3 (BS3)                                    | 46.49        |
| 45   | CIBE_0155 | nusG  | transcription antitermination factor                          | 46.45        |
| 46   | CIBE_4607 | yodS  | putative aminoacyloate CoA-transferase                        | 46.44        |
| 47   | CIBE_0183 | rpsH  | ribosomal protein S8 (BS8)                                    | 46.17        |
| 48   | CIBE_2315 | fbaA  | fructose-1,6-bisphosphate aldolase                            | 45.70        |
| 49   | CIBE_0180 | rplE  | ribosomal protein L5 (BL6)                                    | 44.85        |
| 50   | CIBE_0181 | rpsNA | ribosomal protein S14                                         | 44.49        |
| 51   | CIBE_0564 | mnaA  | UDP-N-acetylmannosamine 2-epimerase                           | 44.31        |
| 52   | CIBE_0186 | rpsE  | ribosomal protein S5                                          | 44.07        |
| 53   | CIBE_0173 | rplV  | ribosomal protein L22 (BL17)                                  | 43.64        |
| 54   | CIBE_0100 | yabN  | putative fusion methylase and nucleotide pyrophosphohydrolase | 43.50        |
| 55   | CIBE_0171 | -     | protein of unknown function                                   | 43.38        |
| 56   | CIBE_0167 | rplC  | ribosomal protein L3 (BL3)                                    | 42.93        |
| 57   | CIBE_0166 | rpsJ  | ribosomal protein S10 (BS13)                                  | 42.76        |
| 58   | CIBE_1391 | rpmB  | ribosomal protein L28                                         | 42.55        |
| 59   | CIBE_0133 | -     | Metal-binding protein of ferredoxin fold                      | 42.54        |
| 60   | CIBE_1413 | rpsP  | ribosomal protein S16 (BS17)                                  | 42.26        |
| 61   | CIBE_1721 | -     | conserved protein of unknown function                         | 41.91        |

|     |           |       |                                                                        |       |
|-----|-----------|-------|------------------------------------------------------------------------|-------|
| 62  | CIBE_1305 | -     | conserved protein of unknown function                                  | 41.21 |
| 63  | CIBE_0640 | -     | conserved protein of unknown function                                  | 40.71 |
| 64  | CIBE_0192 | -     | conserved protein of unknown function                                  | 40.56 |
| 65  | CIBE_2132 | -     | Single-stranded DNA-binding protein                                    | 40.26 |
| 66  | CIBE_6107 | rpsR  | ribosomal protein S18                                                  | 40.26 |
| 67  | CIBE_6076 | -     | Acyl-CoA dehydrogenase                                                 | 40.10 |
| 68  | CIBE_1809 | rpml  | ribosomal protein L35                                                  | 39.31 |
| 69  | CIBE_0172 | rpsS  | ribosomal protein S19 (BS19)                                           | 39.17 |
| 70  | CIBE_0157 | rplA  | ribosomal protein L1 (BL1)                                             | 39.16 |
| 71  | CIBE_0198 | rpoA  | RNA polymerase (alpha subunit)                                         | 38.97 |
| 72  | CIBE_0197 | rpsD  | 30S ribosomal subunit protein S4                                       | 38.06 |
| 73  | CIBE_0156 | rplK  | ribosomal protein L11 (BL11)                                           | 37.55 |
| 74  | CIBE_0088 | -     | protein of unknown function                                            | 37.38 |
| 75  | CIBE_0204 | rplM  | ribosomal protein L13                                                  | 36.68 |
| 76  | CIBE_0163 | rpsG  | ribosomal protein S7 (BS7)                                             | 36.62 |
| 77  | CIBE_5209 | -     | conserved exported protein of unknown function                         | 36.30 |
| 78  | CIBE_0203 | truA  | tRNA pseudouridine synthase A                                          | 36.03 |
| 79  | CIBE_0738 | -     | conserved protein of unknown function                                  | 35.47 |
| 80  | CIBE_0187 | rpmD  | ribosomal protein L30 (BL27)                                           | 35.30 |
| 81  | CIBE_0176 | rpmC  | ribosomal protein L29                                                  | 35.25 |
| 82  | CIBE_0185 | rplR  | ribosomal protein L18                                                  | 34.49 |
| 83  | CIBE_0196 | rpsK  | ribosomal protein S11 (BS11)                                           | 34.31 |
| 84  | CIBE_0179 | rplX  | ribosomal protein L24 (BL23)                                           | 33.84 |
| 85  | CIBE_0191 | mapA  | methionine aminopeptidase                                              | 33.59 |
| 86  | CIBE_0152 | tufA  | elongation factor Tu                                                   | 32.91 |
| 87  | CIBE_0153 | rpmGA | ribosomal protein L33                                                  | 32.45 |
| 88  | CIBE_1791 | -     | conserved protein of unknown function                                  | 31.63 |
| 89  | CIBE_0165 | tufA  | elongation factor Tu                                                   | 30.63 |
| 90  | CIBE_0154 | secE  | Protein translocase subunit SecE                                       | 30.27 |
| 91  | CIBE_0824 | -     | Type 11 methyltransferase                                              | 30.15 |
| 92  | CIBE_0188 | rplO  | ribosomal protein L15                                                  | 29.54 |
| 93  | CIBE_0089 | spoVG | regulator required for spore cortex synthesis (stage V sporulation)    | 28.51 |
| 94  | CIBE_0740 | rbr   | Rubryerythrin                                                          | 28.48 |
| 95  | CIBE_5157 | hag   | flagellin protein                                                      | 28.42 |
| 96  | CIBE_0182 | -     | protein of unknown function                                            | 28.26 |
| 97  | CIBE_1176 | rplY  | 50S ribosomal protein L25                                              | 26.65 |
| 98  | CIBE_0190 | adk   | adenylate kinase                                                       | 26.56 |
| 99  | CIBE_0343 | mmgB  | 3-hydroxybutyryl-CoA dehydrogenase                                     | 26.51 |
| 100 | CIBE_5882 | -     | conserved protein of unknown function                                  | 26.30 |
| 101 | CIBE_0679 | rplU  | ribosomal protein L21 (BL20)                                           | 26.15 |
| 102 | CIBE_1722 | -     | conserved protein of unknown function                                  | 26.15 |
| 103 | CIBE_1426 | rpsB  | ribosomal protein S2                                                   | 26.11 |
| 104 | CIBE_2028 | -     | conserved protein of unknown function                                  | 25.60 |
| 105 | CIBE_6075 | -     | Beta-lactamase domain protein                                          | 24.69 |
| 106 | CIBE_0869 | manX  | fused mannose-specific PTS enzymes: IIA component ; IIB component      | 23.91 |
| 107 | CIBE_0870 | levF  | phosphotransferase system (PTS) fructose-specific enzyme IIC component | 23.81 |
| 108 | CIBE_0586 | -     | conserved protein of unknown function                                  | 23.76 |
| 109 | CIBE_0737 | prkA  | serine protein kinase                                                  | 23.61 |
| 110 | CIBE_1417 | rplS  | ribosomal protein L19                                                  | 23.59 |
| 111 | CIBE_0770 | pgk   | phosphoglycerate kinase                                                | 23.25 |
| 112 | CIBE_1810 | rplT  | ribosomal protein L20                                                  | 22.88 |
| 113 | CIBE_1010 | dnaK  | molecular chaperone                                                    | 22.70 |
| 114 | CIBE_0341 | etfB  | Electron transfer flavoprotein subunit beta                            | 22.17 |
| 115 | CIBE_0741 | -     | conserved protein of unknown function                                  | 22.03 |
| 116 | CIBE_0189 | secY  | Protein translocase subunit SecY                                       | 21.81 |
| 117 | CIBE_5055 | -     | FeoA family protein                                                    | 21.49 |
| 118 | CIBE_1808 | infC  | initiation factor IF-3                                                 | 19.79 |
| 119 | CIBE_0567 | atpB  | ATP synthase subunit a                                                 | 19.66 |
| 120 | CIBE_2780 | -     | conserved protein of unknown function                                  | 19.57 |
| 121 | CIBE_0064 | -     | conserved protein of unknown function                                  | 18.51 |
| 122 | CIBE_0105 | -     | Septum formation initiator                                             | 18.44 |
| 123 | CIBE_0739 | -     | Stage V sporulation protein R                                          | 18.06 |
| 124 | CIBE_0572 | atpG  | ATP synthase gamma chain                                               | 17.93 |
| 125 | CIBE_1405 | acpA  | acyl carrier protein                                                   | 17.40 |
| 126 | CIBE_0160 | rpoB  | RNA polymerase (beta subunit)                                          | 17.31 |

|     |           |         |                                                                                                  |       |
|-----|-----------|---------|--------------------------------------------------------------------------------------------------|-------|
| 127 | CIBE_4726 | -       | conserved protein of unknown function                                                            | 17.24 |
| 128 | CIBE_5187 | -       | Flavodoxin/nitric oxide synthase                                                                 | 17.21 |
| 129 | CIBE_2018 | efp     | elongation factor P                                                                              | 17.20 |
| 130 | CIBE_0629 | ribU    | Riboflavin transporter RibU                                                                      | 17.18 |
| 131 | CIBE_0289 | rbr     | Rubrerythrin                                                                                     | 16.78 |
| 132 | CIBE_2027 | -       | Stage III sporulation protein AH                                                                 | 16.75 |
| 133 | CIBE_1031 | ppdK    | Pyruvate, phosphate dikinase                                                                     | 16.64 |
| 134 | CIBE_0571 | atpA    | ATP synthase (subunit alpha, component F1)                                                       | 16.63 |
| 135 | CIBE_5226 | cysK    | cysteine synthase                                                                                | 16.31 |
| 136 | CIBE_1457 | ptsH    | histidine-containing phosphocarrier protein of the phosphotransferase system (PTS) (HPr protein) | 16.16 |
| 137 | CIBE_1400 | pta     | Phosphate acetyltransferase                                                                      | 15.75 |
| 138 | CIBE_0413 | sorD    | Sorbitol-6-phosphate 2-dehydrogenase                                                             | 15.74 |
| 139 | CIBE_1414 | ylqC    | putative RNA binding protein                                                                     | 15.68 |
| 140 | CIBE_1021 | yqeY    | conserved hypothetical protein                                                                   | 15.68 |
| 141 | CIBE_5894 | -       | Glycoside hydrolase                                                                              | 15.49 |
| 142 | CIBE_4975 | hsp     | 18 kDa heat shock protein                                                                        | 15.35 |
| 143 | CIBE_0993 | spoilAB | anti-sigma factor (antagonist of sigma(F)) and serine kinase                                     | 15.31 |
| 144 | CIBE_3470 | adh     | NADP-dependent isopropanol dehydrogenase                                                         | 15.17 |
| 145 | CIBE_5681 | -       | Cell wall-binding protein                                                                        | 15.11 |
| 146 | CIBE_0536 | -       | Glycosyl transferase, group 1                                                                    | 15.05 |
| 147 | CIBE_1313 | -       | conserved exported protein of unknown function                                                   | 14.94 |
| 148 | CIBE_1427 | tsf     | elongation factor Ts                                                                             | 14.75 |
| 149 | CIBE_1445 | rpsO    | ribosomal protein S15 (BS18)                                                                     | 14.64 |
| 150 | CIBE_5968 | yaaK    | DNA binding protein                                                                              | 14.64 |
| 151 | CIBE_2050 | adh     | NADPH-dependent butanol dehydrogenase                                                            | 14.46 |
| 152 | CIBE_4431 | -       | conserved exported protein of unknown function                                                   | 14.40 |
| 153 | CIBE_0771 | tpiA    | triose phosphate isomerase                                                                       | 14.39 |
| 154 | CIBE_1009 | grpE    | Protein GrpE                                                                                     | 14.29 |
| 155 | CIBE_4958 | -       | conserved protein of unknown function                                                            | 14.15 |
| 156 | CIBE_1001 | rpsT    | ribosomal protein S20 (BS20)                                                                     | 14.05 |
| 157 | CIBE_0164 | fusA    | elongation factor G                                                                              | 14.04 |
| 158 | CIBE_0542 | veg     | conserved hypothetical protein                                                                   | 13.94 |
| 159 | CIBE_1358 | ylmC    | essential sporulation protein                                                                    | 13.90 |
| 160 | CIBE_5855 | pyk     | pyruvate kinase                                                                                  | 13.83 |
| 161 | CIBE_0538 | yabG    | sporulation-specific protease                                                                    | 13.76 |
| 162 | CIBE_1582 | clpX    | protein unfolding ATPase required for presentation of proteins to proteases                      | 13.74 |
| 163 | CIBE_0224 | buk     | branched-chain fatty-acid kinase                                                                 | 13.73 |
| 164 | CIBE_5065 | glnA    | glutamine synthetase                                                                             | 13.69 |
| 165 | CIBE_5054 | -       | FeoA family protein                                                                              | 13.68 |
| 166 | CIBE_1611 | -       | conserved exported protein of unknown function                                                   | 13.66 |
| 167 | CIBE_1586 | -       | conserved protein of unknown function                                                            | 13.46 |
| 168 | CIBE_1831 | sepF    | Cell division protein SepF                                                                       | 13.45 |
| 169 | CIBE_1581 | clpP    | ATP-dependent Clp protease proteolytic subunit                                                   | 13.30 |
| 170 | CIBE_0159 | rplL    | ribosomal protein L12 (BL9)                                                                      | 13.19 |
| 171 | CIBE_0768 | -       | Transcriptional regulator, DeoR family                                                           | 13.01 |
| 172 | CIBE_1373 | spoIVA  | morphogenetic stage IV sporulation protein                                                       | 13.01 |
| 173 | CIBE_1401 | ackA    | acetate kinase                                                                                   | 12.75 |
| 174 | CIBE_0570 | atpH    | ATP synthase subunit delta                                                                       | 12.67 |
| 175 | CIBE_5682 | -       | Cell wall-binding protein                                                                        | 12.59 |
| 176 | CIBE_2783 | -       | conserved protein of unknown function                                                            | 12.54 |
| 177 | CIBE_0554 | -       | Monogalactosyldiacylglycerol synthase                                                            | 12.51 |
| 178 | CIBE_0065 | -       | conserved exported protein of unknown function                                                   | 12.42 |
| 179 | CIBE_5924 | glgC    | glucose-1-phosphate adenylyltransferase (ADP-glucose pyrophosphorylase) subunit alpha            | 12.42 |
| 180 | CIBE_1012 | dnaj    | co-factor of molecular chaperone                                                                 | 12.10 |
| 181 | CIBE_1403 | rpmF    | ribosomal protein L32                                                                            | 12.06 |
| 182 | CIBE_0193 | infA    | initiation factor IF-I                                                                           | 11.96 |
| 183 | CIBE_4106 | -       | conserved protein of unknown function                                                            | 11.91 |
| 184 | CIBE_0215 | ptsI    | phosphotransferase system (PTS) enzyme I                                                         | 11.81 |
| 185 | CIBE_2041 | spoOA   | response regulator                                                                               | 11.78 |
| 186 | CIBE_1331 | cymR    | transcriptional regulator of cysteine biosynthesis                                               | 11.69 |
| 187 | CIBE_3665 | -       | conserved protein of unknown function                                                            | 11.68 |
| 188 | CIBE_0893 | dhaS    | 3-hydroxypropionaldehyde dehydrogenase                                                           | 11.62 |
| 189 | CIBE_5170 | fliY    | flagellar motor switching and energizing phosphatase                                             | 11.61 |
| 190 | CIBE_3469 | -       | conserved protein of unknown function                                                            | 11.59 |
| 191 | CIBE_2402 | yqeA    | amino acid (carbamate) kinase                                                                    | 11.58 |

|     |           |         |                                                                                              |       |
|-----|-----------|---------|----------------------------------------------------------------------------------------------|-------|
| 192 | CIBE_0342 | etfA    | electron transfer flavoprotein (alpha subunit)                                               | 11.56 |
| 193 | CIBE_1591 | -       | conserved protein of unknown function                                                        | 11.49 |
| 194 | CIBE_4056 | dfx     | Desulfoferrodoxin                                                                            | 11.47 |
| 195 | CIBE_0774 | eno     | enolase                                                                                      | 11.20 |
| 196 | CIBE_0992 | spolIIA | Anti-sigma F factor antagonist                                                               | 11.20 |
| 197 | CIBE_6021 | -       | conserved exported protein of unknown function                                               | 11.20 |
| 198 | CIBE_0318 | -       | ABC transporter, ATP-binding protein                                                         | 11.14 |
| 199 | CIBE_0104 | -       | Spore cortex biosynthesis protein YabQ                                                       | 11.09 |
| 200 | CIBE_2139 | asd     | aspartate-semialdehyde dehydrogenase                                                         | 11.01 |
| 201 | CIBE_2381 | -       | protein of unknown function                                                                  | 10.93 |
| 202 | CIBE_5923 | -       | Glucose-1-phosphate adenylyltransferase                                                      | 10.88 |
| 203 | CIBE_4919 | -       | SAM-dependent methyltransferase                                                              | 10.85 |
| 204 | CIBE_0569 | atpF    | ATP synthase subunit b                                                                       | 10.67 |
| 205 | CIBE_1455 | rny     | endoribonuclease Y                                                                           | 10.58 |
| 206 | CIBE_3410 | opuCA   | glycine betaine/carnitine/choline/choline sulfate ABC transporter (ATP-binding protein)      | 10.48 |
| 207 | CIBE_2131 | -       | Deacetylase                                                                                  | 10.44 |
| 208 | CIBE_1580 | tig     | prolyl isomerase (trigger factor)                                                            | 10.43 |
| 209 | CIBE_2390 | -       | Sporulation stage II, protein M                                                              | 10.36 |
| 210 | CIBE_0568 | atpE    | ATP synthase subunit c                                                                       | 10.32 |
| 211 | CIBE_5172 | -       | putative CheW protein                                                                        | 10.25 |
| 212 | CIBE_0573 | atpD    | ATP synthase (subunit beta, component F1)                                                    | 10.23 |
| 213 | CIBE_0953 | trxA    | Thioredoxin                                                                                  | 10.18 |
| 214 | CIBE_5707 | -       | conserved protein of unknown function                                                        | 10.15 |
| 215 | CIBE_0097 | -       | Peptidylprolyl isomerase                                                                     | 10.04 |
| 216 | CIBE_5881 | acpS    | holo-acyl carrier protein synthase                                                           | 9.94  |
| 217 | CIBE_0280 | -       | conserved exported protein of unknown function                                               | 9.91  |
| 218 | CIBE_1446 | pnpA    | polynucleotide phosphorylase (PNPase)                                                        | 9.91  |
| 219 | CIBE_5053 | -       | Ferrous iron transport protein B                                                             | 9.78  |
| 220 | CIBE_4850 | nox     | NADH oxidase                                                                                 | 9.74  |
| 221 | CIBE_0223 | ptb     | phosphate butyryl coenzyme A transferase                                                     | 9.72  |
| 222 | CIBE_0577 | -       | Sporulation protein                                                                          | 9.65  |
| 223 | CIBE_1306 | -       | conserved protein of unknown function                                                        | 9.56  |
| 224 | CIBE_1008 | hrcA    | Heat-inducible transcription repressor HrcA                                                  | 9.45  |
| 225 | CIBE_1340 | rsmF    | pre-16S ribosomal RNA maturation enzyme                                                      | 9.39  |
| 226 | CIBE_1344 | rnjA    | ribonuclease J1                                                                              | 9.39  |
| 227 | CIBE_0871 | levG    | phosphotransferase system (PTS) fructose-specific enzyme IID component                       | 9.29  |
| 228 | CIBE_5717 | -       | protein of unknown function                                                                  | 9.26  |
| 229 | CIBE_3001 | ftnA    | Ferritin                                                                                     | 9.11  |
| 230 | CIBE_0106 | yabR    | putative RNA degradation protein; polyribonucleotide nucleotidyltransferase or phosphorylase | 9.02  |
| 231 | CIBE_4104 | -       | Phage-like element pbsx protein XkdM                                                         | 8.97  |
| 232 | CIBE_4880 | -       | Pyruvate flavodoxin/ferredoxin oxidoreductase domain protein                                 | 8.94  |
| 233 | CIBE_5173 | cheY    | regulator of chemotaxis and motility                                                         | 8.92  |
| 234 | CIBE_5742 | -       | conserved protein of unknown function                                                        | 8.91  |
| 235 | CIBE_0994 | sigF    | RNA polymerase sporulation-specific sigma factor (sigma-F)                                   | 8.89  |
| 236 | CIBE_3436 | -       | Electron transfer flavoprotein, alpha/beta-subunit-like protein                              | 8.74  |
| 237 | CIBE_1333 | iscU    | scaffold protein                                                                             | 8.74  |
| 238 | CIBE_0579 | spolIID | transcriptional regulator                                                                    | 8.68  |
| 239 | CIBE_0566 | -       | conserved membrane protein of unknown function                                               | 8.62  |
| 240 | CIBE_2026 | -       | Stage III sporulation protein AG                                                             | 8.61  |
| 241 | CIBE_3435 | -       | Electron transfer flavoprotein, alpha subunit-like protein                                   | 8.57  |
| 242 | CIBE_1339 | yrzL    | conserved hypothetical protein                                                               | 8.52  |
| 243 | CIBE_0578 | -       | Peptidase M23B                                                                               | 8.45  |
| 244 | CIBE_3980 | -       | conserved protein of unknown function                                                        | 8.43  |
| 245 | CIBE_5954 | -       | conserved protein of unknown function                                                        | 8.34  |
| 246 | CIBE_5683 | -       | putative cell wall binding repeat-containing protein                                         | 8.34  |
| 247 | CIBE_0114 | greA    | transcription elongation factor                                                              | 8.26  |
| 248 | CIBE_1638 | -       | Appr-1-p processing domain protein                                                           | 8.24  |
| 249 | CIBE_5856 | pfkA    | 6-phosphofructokinase                                                                        | 8.17  |
| 250 | CIBE_4218 | acdA    | acyl-CoA dehydrogenase                                                                       | 8.13  |
