# Supplementary material for: Genome and transcriptome of the natural isopropanol producer Clostridium beijerinckii DSM6423
Source: PubMed Central journal article supplement (PMC5894183; doi:10.1186/s12864-018-4636-7), 2018-04-10
Supplement: 12864_2018_4636_MOESM5_ESM.pdf [file 12864_2018_4636_MOESM5_ESM.pdf]

## Additional file 5: Clusters of differential expressed genes in *C. beijerinckii* DSM6423 glucose fermentation

| Clusters     |     | genes |  |
|--------------|-----|-------|--|
| name         | nb  | %     |  |
| 6up++        | 18  | 44%   |  |
| 6up+         | 58  | 21%   |  |
| 6up          | 431 | 1%    |  |
| 6down        | 203 | 21%   |  |
| 6down-       | 14  | 6%    |  |
| 8up+         | 8   | 2%    |  |
| 8up          | 206 | 0%    |  |
| 8down        | 6   | 1%    |  |
| 11up         | 23  | 1%    |  |
| Unclassified | 20  | 2%    |  |
| TOTAL        | 987 |       |  |

| Genes     | Cluster | log2(FC vs T3h) |       |        |        | gene name | functional annotation                                                           |
|-----------|---------|-----------------|-------|--------|--------|-----------|---------------------------------------------------------------------------------|
|           |         | T6/T3           | T8/T3 | T11/T3 | T24/T3 |           |                                                                                 |
| CIBE_0313 | 6up++   | 5.3             | 6.2   | 7.2    | 5.8    | -         | conserved protein of unknown function                                           |
| CIBE_0312 | 6up++   | 5.0             | 6.3   | 7.4    | 5.6    | -         | conserved protein of unknown function                                           |
| CIBE_0311 | 6up++   | 5.0             | 6.4   | 7.0    | 5.3    | -         | conserved protein of unknown function                                           |
| CIBE_0314 | 6up++   | 4.1             | 5.9   | 7.0    | 5.8    | -         | conserved protein of unknown function                                           |
| CIBE_0315 | 6up++   | 5.1             | 5.9   | 6.1    | 5.0    | -         | Radical SAM-family protein                                                      |
| CIBE_0310 | 6up++   | 4.7             | 6.3   | 5.9    | 4.6    | -         | putative ABC transporter ATP-binding protein                                    |
| CIBE_3477 | 6up++   | 5.5             | 5.6   | 5.4    | 4.4    | -         | Accessory gene regulator B                                                      |
| CIBE_3478 | 6up++   | 5.3             | 5.8   | 5.0    | 4.3    | -         | conserved membrane protein of unknown function                                  |
| CIBE_0316 | 6up++   | 4.5             | 5.5   | 5.6    | 4.2    | -         | conserved protein of unknown function                                           |
| CIBE_4430 | 6up++   | 4.4             | 6.4   | 5.4    | 3.6    | -         | putative permease                                                               |
| CIBE_4429 | 6up++   | 3.7             | 5.7   | 4.8    | 3.5    | -         | putative permease                                                               |
| CIBE_0280 | 6up++   | 4.5             | 4.9   | 4.3    | 3.9    | -         | conserved exported protein of unknown function                                  |
| CIBE_3828 | 6up++   | 4.4             | 5.6   | 4.4    | 3.2    | -         | Glycosyl transferase                                                            |
| CIBE_4431 | 6up++   | 2.7             | 5.4   | 5.5    | 3.6    | -         | conserved exported protein of unknown function                                  |
| CIBE_4419 | 6up++   | 3.7             | 5.5   | 4.4    | 3.1    | -         | conserved exported protein of unknown function                                  |
| CIBE_4428 | 6up++   | 3.1             | 5.4   | 4.7    | 3.2    | glr       | Transporter                                                                     |
| CIBE_4418 | 6up++   | 3.4             | 5.4   | 4.4    | 2.4    | -         | conserved exported protein of unknown function                                  |
| CIBE_3476 | 6up+    | 4.4             | 4.6   | 4.3    | 3.6    | -         | conserved protein of unknown function                                           |
| CIBE_3751 | 6up+    | 3.8             | 5.2   | 3.8    | 3.1    | -         | conserved protein of unknown function                                           |
| CIBE_3750 | 6up+    | 3.9             | 4.6   | 3.7    | 3.4    | -         | conserved protein of unknown function                                           |
| CIBE_4789 | 6up+    | 3.7             | 4.3   | 3.9    | 3.5    | cfg       | putative AgrB-like protein                                                      |
| CIBE_0824 | 6up+    | 4.8             | 3.9   | 3.8    | 2.7    | -         | Type 11 methyltransferase                                                       |
| CIBE_3749 | 6up+    | 4.1             | 4.4   | 3.5    | 2.8    | -         | Peptide synthetase                                                              |
| CIBE_5303 | 6up+    | 4.6             | 4.0   | 3.1    | 2.7    | -         | conserved protein of unknown function                                           |
| CIBE_2622 | 6up+    | 2.8             | 3.7   | 3.9    | 4.0    | adh       | NADPH-dependent butanol dehydrogenase                                           |
| CIBE_4040 | 6up+    | 3.0             | 3.3   | 4.1    | 3.7    | -         | Aliphatic sulfonates family ABC transporter, periplasmic ligand-binding protein |
| CIBE_3079 | 6up+    | 4.3             | 3.5   | 3.3    | 2.8    | panD      | aspartate 1-decarboxylase                                                       |
| CIBE_4039 | 6up+    | 2.9             | 3.2   | 3.9    | 4.1    | tauB      | taurine transporter subunit ; ATP-binding component of ABC superfamily          |
| CIBE_3082 | 6up+    | 4.2             | 3.4   | 3.0    | 2.9    | -         | conserved protein of unknown function                                           |
| CIBE_4610 | 6up+    | 2.1             | 4.1   | 4.1    | 3.3    | -         | Peptidase C1A, papain                                                           |
| CIBE_4417 | 6up+    | 3.1             | 4.7   | 3.5    | 2.2    | -         | conserved membrane protein of unknown function                                  |
| CIBE_3475 | 6up+    | 3.5             | 3.7   | 3.4    | 2.8    | -         | Histidine kinase                                                                |
| CIBE_4036 | 6up+    | 2.7             | 3.0   | 3.9    | 3.7    | -         | Thioredoxin reductase                                                           |
| CIBE_3355 | 6up+    | 3.8             | 3.0   | 3.1    | 3.3    | -         | RNA polymerase sigma factor SigI                                                |
| CIBE_3081 | 6up+    | 4.1             | 3.4   | 2.9    | 2.8    | panB      | ketopantoate hydroxymethyltransferase                                           |
| CIBE_4038 | 6up+    | 2.8             | 2.8   | 3.8    | 3.7    | -         | Type I phosphodiesterase/nucleotide pyrophosphatase                             |
| CIBE_2623 | 6up+    | 2.6             | 3.3   | 3.8    | 3.3    | -         | conserved protein of unknown function                                           |
| CIBE_5304 | 6up+    | 4.3             | 3.6   | 2.7    | 2.4    | -         | conserved protein of unknown function                                           |
| CIBE_3537 | 6up+    | 2.9             | 4.5   | 2.5    | 3.1    | -         | putative transcriptional regulator                                              |
| CIBE_5707 | 6up+    | 3.0             | 3.4   | 3.6    | 2.9    | -         | conserved protein of unknown function                                           |
| CIBE_0782 | 6up+    | 2.2             | 2.8   | 3.7    | 4.1    | -         | Nitrogenase                                                                     |
| CIBE_4041 | 6up+    | 2.3             | 3.1   | 3.8    | 3.6    | tauC      | taurine transporter subunit ; membrane component of ABC superfamily             |
| CIBE_2624 | 6up+    | 2.2             | 3.3   | 3.8    | 3.5    | sudA      | Sulfide dehydrogenase subunit alpha                                             |
| CIBE_3080 | 6up+    | 4.0             | 3.3   | 3.1    | 2.3    | panC      | pantothenate synthetase                                                         |
| CIBE_3353 | 6up+    | 3.5             | 2.7   | 2.7    | 3.4    | -         | Beta-glucanase (fragment)                                                       |
| CIBE_4861 | 6up+    | 1.9             | 3.8   | 3.2    | 3.4    | -         | conserved protein of unknown function                                           |
| CIBE_3700 | 6up+    | 1.2             | 3.3   | 3.9    | 3.9    | -         | YIEGIA protein                                                                  |
| CIBE_3753 | 6up+    | 3.1             | 3.6   | 2.4    | 3.1    | -         | protein of unknown function                                                     |
| CIBE_3354 | 6up+    | 3.8             | 2.9   | 2.6    | 2.8    | bgIA      | Beta-glucanase                                                                  |
| CIBE_3748 | 6up+    | 3.7             | 3.7   | 2.7    | 2.0    | -         | putative cyclic peptide transporter                                             |
| CIBE_4416 | 6up+    | 3.2             | 4.3   | 3.2    | 1.2    | -         | conserved membrane protein of unknown function                                  |
| CIBE_1176 | 6up+    | 4.3             | 3.3   | 2.6    | 1.7    | rplY      | 50S ribosomal protein L25                                                       |
| CIBE_4788 | 6up+    | 3.2             | 3.5   | 2.6    | 2.4    | -         | CHAP domain containing protein                                                  |
| CIBE_3357 | 6up+    | 4.2             | 2.8   | 2.3    | 2.5    | -         | Carbohydrate-binding family V/XII                                               |
| CIBE_2891 | 6up+    | 3.7             | 3.1   | 2.3    | 2.6    | -         | Electron transport complex, RnfABCDGE type, D subunit                           |
| CIBE_6013 | 6up+    | 4.4             | 3.5   | 1.9    | 1.7    | -         | conserved protein of unknown function                                           |
| CIBE_0281 | 6up+    | 3.7             | 3.9   | 3.3    | 0.7    | -         | conserved membrane protein of unknown function                                  |
| CIBE_4862 | 6up+    | 1.8             | 3.3   | 3.1    | 3.3    | -         | 2-hydroxyglutaryl-CoA dehydratase                                               |
| CIBE_5605 | 6up+    | 2.2             | 2.8   | 3.5    | 3.0    | -         | conserved protein of unknown function                                           |
| CIBE_2892 | 6up+    | 3.8             | 3.0   | 2.2    | 2.3    | -         | Electron transport complex, RnfABCDGE type, G subunit                           |
| CIBE_5208 | 6up+    | 3.0             | 2.9   | 3.1    | 2.4    | -         | Nucleotidyl transferase                                                         |
| CIBE_0725 | 6up+    | 2.5             | 2.9   | 3.1    | 2.5    | cstA      | carbon starvation-induced membrane protein                                      |
| CIBE_3837 | 6up+    | 3.0             | 3.7   | 2.1    | 2.2    | yqaJ      | putative nuclease; skin element                                                 |
| CIBE_4414 | 6up+    | 2.7             | 3.7   | 2.8    | 1.7    | -         | Cell wall-associated hydrolase-like protein                                     |
| CIBE_4037 | 6up+    | 2.2             | 2.3   | 3.5    | 2.8    | -         | Thioredoxin domain                                                              |
| CIBE_5606 | 6up+    | 2.2             | 2.7   | 3.2    | 2.8    | -         | Membrane spanning protein                                                       |
| CIBE_3761 | 6up+    | 3.7             | 2.9   | 2.4    | 1.4    | -         | Multidrug transporter MatE                                                      |
| CIBE_3441 | 6up+    | 1.6             | 3.4   | 3.1    | 2.4    | -         | ABC transporter substrate-binding protein                                       |
| CIBE_2221 | 6up+    | 1.1             | 3.7   | 3.5    | 2.0    | ytfJ      | Uncharacterized spore protein YtfJ                                              |
| CIBE_2951 | 6up+    | 1.4             | 3.5   | 2.8    | 2.3    | -         | conserved protein of unknown function                                           |
| CIBE_2222 | 6up+    | 1.4             | 3.5   | 3.0    | 1.6    | -         | conserved membrane protein of unknown function                                  |
| CIBE_3534 | 6up+    | 1.4             | 3.3   | 2.3    | 2.0    | -         | putative DnaD-like protein, phage replisome organizer                           |

|                  |      |     |     |     |      |         |                                                                                        |
|------------------|------|-----|-----|-----|------|---------|----------------------------------------------------------------------------------------|
| CIBE_4415        | 6up+ | 2.4 | 3.5 | 2.6 | 0.5  | -       | conserved protein of unknown function                                                  |
| CIBE_0309        | 6up+ | 1.4 | 3.2 | 2.4 | 1.1  | -       | protein of unknown function                                                            |
| CIBE_3352        | 6up  | 3.7 | 3.0 | 2.1 | 3.2  | -       | conserved protein of unknown function                                                  |
| CIBE_3401        | 6up  | 3.1 | 2.8 | 2.2 | 3.8  | -       | conserved protein of unknown function                                                  |
| CIBE_3752        | 6up  | 2.9 | 3.4 | 2.3 | 3.1  | -       | protein of unknown function                                                            |
| CIBE_2321        | 6up  | 3.6 | 2.6 | 2.5 | 2.7  | -       | Membrane-like protein                                                                  |
| CIBE_2893        | 6up  | 3.6 | 2.9 | 2.3 | 2.5  | -       | Electron transport complex subunit E                                                   |
| CIBE_0460        | 6up  | 1.9 | 1.7 | 0.0 | -0.2 | -       | conserved protein of unknown function                                                  |
| CIBE_4600        | 6up  | 2.6 | 1.9 | 1.1 | 1.5  | -       | conserved protein of unknown function                                                  |
| CIBE_3469        | 6up  | 2.9 | 2.8 | 2.6 | 2.5  | -       | conserved protein of unknown function                                                  |
| CIBE_2894        | 6up  | 3.4 | 3.0 | 2.1 | 2.1  | rsxA    | putative inner membrane subunit of an electron transport system                        |
| CIBE_4602        | 6up  | 2.8 | 1.3 | 0.9 | 0.0  | -       | ThiJ/PfpI domain protein                                                               |
| CIBE_2895        | 6up  | 3.5 | 2.8 | 2.1 | 2.2  | -       | Protein RnfB                                                                           |
| CIBE_3350        | 6up  | 3.9 | 2.3 | 2.0 | 2.4  | -       | Beta and gamma crystallin                                                              |
| CIBE_3770        | 6up  | 3.2 | 2.8 | 2.7 | 1.8  | -       | Multi-sensor signal transduction histidine kinase                                      |
| CIBE_3468        | 6up  | 2.6 | 2.6 | 2.5 | 2.7  | sudA    | Sulfide dehydrogenase subunit alpha                                                    |
| CIBE_3356        | 6up  | 3.6 | 2.2 | 1.4 | 3.3  | -       | Glycoside hydrolase, family 18 (modular protein)                                       |
| CIBE_2889        | 6up  | 3.2 | 2.7 | 2.2 | 2.2  | -       | Positive regulator of sigma E, RseC/MucC                                               |
| CIBE_6055        | 6up  | 2.7 | 2.0 | 1.6 | 4.0  | pdxS    | glutamine amidotransferase for pyridoxal phosphate synthesis                           |
| CIBE_3769        | 6up  | 2.8 | 2.6 | 3.0 | 1.9  | -       | conserved protein of unknown function                                                  |
| CIBE_4538        | 6up  | 2.4 | 2.2 | 2.7 | 2.9  | -       | RNA polymerase, sigma-24 subunit, ECF subfamily                                        |
| CIBE_5205        | 6up  | 2.9 | 2.5 | 2.8 | 1.9  | phnW    | 2-aminoethylphosphonate--pyruvate transaminase                                         |
| CIBE_0282        | 6up  | 3.0 | 3.3 | 2.4 | 1.5  | -       | conserved membrane protein of unknown function                                         |
| CIBE_6021        | 6up  | 3.5 | 2.6 | 2.1 | 1.9  | -       | conserved exported protein of unknown function                                         |
| CIBE_p0005       | 6up  | 3.8 | 2.5 | 1.8 | 2.0  | -       | putative Peptidase M10A and M12B matrixin and adamalysin                               |
| CIBE_3470        | 6up  | 2.6 | 2.4 | 2.5 | 2.4  | adh     | NADP-dependent isopropanol dehydrogenase                                               |
| CIBE_3827        | 6up  | 3.1 | 3.2 | 1.7 | 2.0  | -       | protein of unknown function                                                            |
| CIBE_5206        | 6up  | 2.8 | 2.5 | 2.6 | 2.0  | -       | Phosphoenolpyruvate decarboxylase                                                      |
| CIBE_3176        | 6up  | 2.8 | 2.5 | 2.0 | 2.7  | -       | Coagulation factor 5/8 type domain protein                                             |
| CIBE_3835        | 6up  | 2.7 | 3.2 | 1.8 | 2.2  | -       | putative Phage replisome organizer                                                     |
| CIBE_6054        | 6up  | 2.5 | 1.8 | 1.5 | 4.0  | pdxT    | glutamine amidotransferase for pyridoxal phosphate synthesis                           |
| CIBE_3351        | 6up  | 3.4 | 2.5 | 2.0 | 1.9  | -       | Chitinase                                                                              |
| CIBE_3419        | 6up  | 3.5 | 2.5 | 2.0 | 1.7  | -       | conserved protein of unknown function                                                  |
| CIBE_4603        | 6up  | 2.8 | 1.5 | 0.8 | 0.1  | -       | protein of unknown function                                                            |
| CIBE_5207        | 6up  | 2.7 | 2.4 | 2.5 | 1.9  | -       | Cytidyltransferase-related domain                                                      |
| CIBE_0579        | 6up  | 1.7 | 2.9 | 2.7 | 2.3  | spolIID | transcriptional regulator                                                              |
| CIBE_2890        | 6up  | 3.1 | 2.3 | 2.0 | 2.1  | rnfC    | Electron transport complex subunit RnfC                                                |
| CIBE_0283        | 6up  | 2.6 | 3.1 | 2.5 | 1.3  | yybJ    | putative ATP-binding cassette protein                                                  |
| CIBE_3110        | 6up  | 3.2 | 2.6 | 0.9 | 2.9  | -       | protein of unknown function                                                            |
| CIBE_3194        | 6up  | 3.4 | 2.0 | 2.0 | 2.1  | -       | GCN5-related N-acetyltransferase                                                       |
| CIBE_3909        | 6up  | 3.2 | 2.2 | 1.9 | 2.2  | -       | protein of unknown function                                                            |
| CIBE_5701        | 6up  | 2.7 | 2.3 | 1.9 | 2.5  | -       | Glutamine transport ATP-binding protein GlnQ (fragment)                                |
| CIBE_1173        | 6up  | 2.5 | 1.8 | 2.0 | 3.0  | -       | Membrane protein                                                                       |
| CIBE_6000        | 6up  | 2.6 | 2.3 | 2.5 | 1.9  | -       | GntR family transcriptional regulator                                                  |
| CIBE_5300        | 6up  | 3.2 | 2.3 | 1.8 | 2.0  | -       | FHA domain containing protein                                                          |
| CIBE_5290        | 6up  | 3.9 | 2.4 | 1.8 | 1.1  | -       | conserved protein of unknown function                                                  |
| CIBE_2455        | 6up  | 2.2 | 3.4 | 1.7 | 1.9  | -       | conserved protein of unknown function                                                  |
| CIBE_2050        | 6up  | 3.5 | 2.5 | 1.6 | 1.6  | adh     | NADPH-dependent butanol dehydrogenase                                                  |
| CIBE_3200        | 6up  | 3.5 | 2.3 | 1.8 | 1.5  | -       | Cytidine deaminase                                                                     |
| CIBE_0834        | 6up  | 2.7 | 2.5 | 1.9 | 2.0  | amyA    | Alpha-amylase                                                                          |
| CIBE_1313        | 6up  | 3.3 | 2.5 | 2.1 | 1.3  | -       | conserved exported protein of unknown function                                         |
| CIBE_5299        | 6up  | 3.2 | 2.3 | 2.0 | 1.5  | -       | Protein phosphatase                                                                    |
| CIBE_misc_RNA_38 | 6up  | 2.8 | 2.5 | 1.9 | 1.8  | -       | TPP                                                                                    |
| CIBE_3423        | 6up  | 3.0 | 1.9 | 1.8 | 2.3  | -       | Amino acid adenylation domain protein                                                  |
| CIBE_misc_RNA_6  | 6up  | 2.0 | 2.7 | 2.2 | 2.1  | -       | ydaO-yuaA                                                                              |
| CIBE_3421        | 6up  | 2.8 | 1.9 | 1.9 | 2.3  | -       | Long-chain-fatty-acid--(Acyl-carrier-protein) ligase., 6-deoxyerythronolide-B synthase |
| CIBE_p0006       | 6up  | 3.2 | 2.5 | 1.7 | 1.5  | -       | exported protein of unknown function                                                   |
| CIBE_3169        | 6up  | 3.1 | 2.6 | 1.6 | 1.4  | ycbN    | putative ABC efflux transporter (ATP-binding protein)                                  |
| CIBE_1314        | 6up  | 3.5 | 2.4 | 1.3 | 1.5  | -       | protein of unknown function                                                            |
| CIBE_6115        | 6up  | 1.6 | 3.2 | 1.8 | 2.0  | yyaC    | conserved hypothetical protein                                                         |
| CIBE_6012        | 6up  | 3.5 | 2.3 | 1.4 | 1.3  | -       | conserved protein of unknown function                                                  |
| CIBE_3109        | 6up  | 2.9 | 2.0 | 0.9 | 2.9  | -       | conserved protein of unknown function                                                  |
| CIBE_5297        | 6up  | 3.0 | 2.0 | 2.0 | 1.6  | -       | Normocyte binding protein 2b                                                           |
| CIBE_3434        | 6up  | 2.9 | 2.1 | 1.5 | 2.1  | lctP    | L-lactate permease                                                                     |
| CIBE_5706        | 6up  | 2.4 | 2.5 | 2.2 | 1.4  | lagD    | Lactococin-G-processing and transport ATP-binding protein LagD                         |
| CIBE_5291        | 6up  | 3.4 | 2.0 | 1.9 | 1.2  | -       | conserved protein of unknown function                                                  |
| CIBE_5288        | 6up  | 3.4 | 2.2 | 1.8 | 1.2  | -       | conserved protein of unknown function                                                  |
| CIBE_4321        | 6up  | 1.9 | 2.2 | 2.3 | 2.1  | -       | RNA polymerase subunit sigma-24                                                        |
| CIBE_6020        | 6up  | 3.3 | 2.6 | 1.7 | 0.9  | -       | conserved protein of unknown function                                                  |
| CIBE_3420        | 6up  | 3.1 | 2.1 | 1.8 | 1.5  | -       | FMN-binding protein                                                                    |
| CIBE_0019        | 6up  | 1.9 | 3.1 | 1.8 | 1.6  | -       | conserved protein of unknown function                                                  |
| CIBE_4317        | 6up  | 2.8 | 2.1 | 1.5 | 2.0  | -       | conserved protein of unknown function                                                  |
| CIBE_5296        | 6up  | 3.2 | 2.2 | 1.9 | 1.2  | -       | conserved protein of unknown function                                                  |
| CIBE_5286        | 6up  | 3.3 | 2.0 | 1.6 | 1.5  | -       | YD repeat protein (fragment)                                                           |
| CIBE_1337        | 6up  | 1.0 | 2.8 | 2.4 | 2.2  | -       | conserved membrane protein of unknown function                                         |
| CIBE_4539        | 6up  | 2.1 | 1.6 | 2.2 | 2.5  | -       | conserved protein of unknown function                                                  |
| CIBE_5302        | 6up  | 3.2 | 2.2 | 1.6 | 1.4  | -       | Heat shock protein DnaJ domain protein                                                 |
| CIBE_1004        | 6up  | 1.5 | 3.3 | 1.2 | 2.4  | -       | conserved exported protein of unknown function                                         |
| CIBE_5294        | 6up  | 3.6 | 2.2 | 1.8 | 0.8  | -       | conserved protein of unknown function                                                  |
| CIBE_6065        | 6up  | 3.0 | 2.3 | 1.3 | 1.7  | -       | protein of unknown function                                                            |
| CIBE_5999        | 6up  | 2.5 | 1.7 | 2.3 | 1.8  | -       | SAM-dependent methyltransferase                                                        |
| CIBE_1287        | 6up  | 1.6 | 1.9 | 2.0 | 2.7  | -       | Glycosyl transferase                                                                   |
| CIBE_1294        | 6up  | 1.7 | 2.0 | 2.1 | 2.6  | -       | membrane protein of unknown function                                                   |
| CIBE_3203        | 6up  | 3.3 | 2.0 | 1.4 | 1.5  | -       | Valyl-tRNA synthetase (fragment)                                                       |
| CIBE_3247        | 6up  | 2.9 | 1.8 | 1.8 | 1.8  | -       | Acetolactate synthase                                                                  |
| CIBE_6011        | 6up  | 3.2 | 2.3 | 1.3 | 1.5  | -       | conserved protein of unknown function                                                  |
| CIBE_4689        | 6up  | 1.7 | 1.7 | 1.9 | 3.0  | -       | Alcohol dehydrogenase GroES domain protein                                             |
| CIBE_5301        | 6up  | 2.9 | 2.2 | 1.6 | 1.5  | -       | conserved protein of unknown function                                                  |
| CIBE_1847        | 6up  | 2.6 | 3.3 | 1.6 | 0.5  | -       | putative pilus biogenesis protein                                                      |
| CIBE_2425        | 6up  | 2.7 | 2.2 | 1.5 | 1.7  | -       | putative molybdenum-pterin-binding protein                                             |
| CIBE_5287        | 6up  | 3.1 | 1.9 | 1.7 | 1.4  | -       | conserved protein of unknown function                                                  |

|                   |     |     |     |     |     |      |                                                                                             |
|-------------------|-----|-----|-----|-----|-----|------|---------------------------------------------------------------------------------------------|
| CIBE_5705         | 6up | 2.2 | 2.4 | 2.2 | 1.3 | -    | conserved protein of unknown function                                                       |
| CIBE_3762         | 6up | 3.0 | 2.0 | 1.4 | 1.7 | -    | Helix-turn-helix-domain containing protein, AraC type                                       |
| CIBE_3641         | 6up | 2.2 | 2.3 | 1.7 | 1.9 | -    | conserved protein of unknown function                                                       |
| CIBE_5295         | 6up | 3.3 | 1.9 | 1.6 | 1.1 | -    | Molecular chaperone                                                                         |
| CIBE_3766         | 6up | 2.3 | 2.1 | 2.2 | 1.3 | -    | conserved protein of unknown function                                                       |
| CIBE_5804         | 6up | 2.0 | 2.6 | 1.6 | 1.8 | -    | protein of unknown function                                                                 |
| CIBE_4320         | 6up | 1.8 | 2.0 | 2.1 | 1.9 | -    | conserved protein of unknown function                                                       |
| CIBE_4537         | 6up | 2.0 | 1.6 | 2.2 | 2.1 | -    | conserved membrane protein of unknown function                                              |
| CIBE_2940         | 6up | 3.1 | 2.0 | 1.3 | 1.4 | -    | Lactate racemization operon protein LarA                                                    |
| CIBE_0284         | 6up | 2.3 | 3.0 | 2.4 | 0.2 | -    | conserved protein of unknown function                                                       |
| CIBE_6001         | 6up | 2.4 | 1.9 | 2.1 | 1.5 | -    | conserved protein of unknown function                                                       |
| CIBE_5042         | 6up | 2.1 | 1.5 | 2.1 | 2.0 | -    | Sulfate adenyltransferase                                                                   |
| CIBE_4315         | 6up | 2.9 | 1.8 | 1.4 | 1.7 | -    | conserved protein of unknown function                                                       |
| CIBE_3435         | 6up | 2.9 | 2.1 | 1.4 | 1.4 | -    | Electron transfer flavoprotein, alpha subunit-like protein                                  |
| CIBE_4919         | 6up | 3.1 | 2.5 | 1.5 | 0.6 | -    | SAM-dependent methyltransferase                                                             |
| CIBE_3422         | 6up | 2.6 | 1.9 | 1.8 | 1.5 | -    | Major facilitator superfamily MFS_1                                                         |
| CIBE_3167         | 6up | 2.7 | 1.8 | 1.1 | 2.1 | -    | protein of unknown function                                                                 |
| CIBE_2391         | 6up | 0.9 | 2.4 | 2.5 | 1.8 | xerD | Tyrosine recombinase XerD                                                                   |
| CIBE_1297         | 6up | 1.6 | 2.2 | 1.9 | 1.8 | -    | Polysaccharide biosynthesis protein                                                         |
| CIBE_4604         | 6up | 3.6 | 2.4 | 0.9 | 0.7 | -    | conserved membrane protein of unknown function                                              |
| CIBE_0792         | 6up | 1.0 | 1.1 | 2.7 | 2.8 | mccb | cystathionine gamma-lyase and homocysteine gamma-lyase for reverse transsulfuration pathway |
| CIBE_4729         | 6up | 3.0 | 1.9 | 1.5 | 1.1 | -    | conserved exported protein of unknown function                                              |
| CIBE_3637         | 6up | 2.8 | 2.5 | 0.8 | 1.3 | -    | protein of unknown function                                                                 |
| CIBE_6002         | 6up | 2.4 | 1.7 | 1.8 | 1.6 | -    | Membrane protein                                                                            |
| CIBE_4690         | 6up | 1.8 | 1.4 | 1.7 | 2.5 | -    | Aminotransferase class-III                                                                  |
| CIBE_5044         | 6up | 2.0 | 1.4 | 2.1 | 2.0 | -    | Adenylylsulfate reductase subunit beta                                                      |
| CIBE_4730         | 6up | 2.9 | 1.9 | 1.6 | 1.0 | -    | Transcriptional regulator, MerR family                                                      |
| CIBE_5050         | 6up | 1.8 | 1.4 | 2.1 | 2.1 | sbp  | sulfate transporter subunit ; periplasmic-binding component of ABC superfamily              |
| CIBE_0829         | 6up | 2.4 | 2.2 | 1.6 | 1.1 | -    | conserved protein of unknown function                                                       |
| CIBE_1292         | 6up | 1.5 | 1.5 | 1.9 | 2.4 | -    | Glycosyl transferase family 2                                                               |
| CIBE_4168         | 6up | 2.2 | 1.8 | 1.7 | 1.6 | -    | 4Fe-4S ferredoxin                                                                           |
| CIBE_0046         | 6up | 0.6 | 2.4 | 2.2 | 2.1 | -    | conserved membrane protein of unknown function                                              |
| CIBE_3248         | 6up | 2.7 | 1.4 | 1.8 | 1.4 | -    | NADH:flavin oxidoreductase/NADH oxidase                                                     |
| CIBE_4195         | 6up | 2.3 | 1.9 | 1.5 | 1.6 | -    | conserved protein of unknown function                                                       |
| CIBE_3197         | 6up | 2.6 | 1.7 | 1.8 | 1.2 | -    | conserved exported protein of unknown function                                              |
| CIBE_3432         | 6up | 2.8 | 1.8 | 1.3 | 1.3 | acdA | acyl-CoA dehydrogenase                                                                      |
| CIBE_5043         | 6up | 2.0 | 1.3 | 2.0 | 2.0 | cysD | sulfate adenyltransferase, subunit 2                                                        |
| CIBE_1115         | 6up | 2.7 | 2.2 | 1.2 | 1.1 | -    | Fucose 4-O-acetylase                                                                        |
| CIBE_3343         | 6up | 2.9 | 1.5 | 1.2 | 1.5 | -    | protein of unknown function                                                                 |
| CIBE_0103         | 6up | 0.7 | 2.5 | 2.2 | 1.8 | -    | YabP family protein                                                                         |
| CIBE_3086         | 6up | 2.7 | 2.0 | 1.5 | 0.8 | fabG | 3-oxoacyl-[acyl-carrier-protein] reductase FabG                                             |
| CIBE_2160         | 6up | 0.8 | 2.4 | 2.5 | 1.4 | -    | Cobalamin synthesis protein, P47K                                                           |
| CIBE_3344         | 6up | 2.8 | 1.9 | 1.4 | 1.1 | -    | protein of unknown function                                                                 |
| CIBE_2454         | 6up | 1.9 | 2.9 | 1.1 | 1.3 | -    | protein of unknown function                                                                 |
| CIBE_2805         | 6up | 2.5 | 1.9 | 1.7 | 1.0 | -    | GCN5-related N-acetyltransferase                                                            |
| CIBE_3747         | 6up | 1.6 | 2.3 | 1.9 | 1.3 | grsB | Gramicidin S synthase 2                                                                     |
| CIBE_5298         | 6up | 2.5 | 1.8 | 1.6 | 1.2 | -    | Serine/threonine protein phosphatase                                                        |
| CIBE_3251         | 6up | 3.5 | 2.1 | 1.1 | 0.4 | -    | conserved exported protein of unknown function                                              |
| CIBE_4606         | 6up | 3.2 | 2.7 | 2.6 | 2.5 | eutE | Ethanolamine utilization protein EutE                                                       |
| CIBE_2390         | 6up | 0.8 | 2.4 | 2.3 | 1.6 | -    | Sporulation stage II, protein M                                                             |
| CIBE_3198         | 6up | 3.2 | 2.2 | 0.1 | 1.6 | -    | conserved exported protein of unknown function                                              |
| CIBE_3433         | 6up | 2.7 | 1.8 | 1.3 | 1.3 | -    | 2-hydroxy-acid oxidase                                                                      |
| CIBE_5289         | 6up | 3.3 | 1.7 | 1.2 | 0.8 | -    | conserved protein of unknown function                                                       |
| CIBE_2942         | 6up | 2.3 | 2.0 | 1.4 | 1.3 | -    | Transcriptional regulator                                                                   |
| CIBE_1296         | 6up | 1.6 | 1.7 | 1.7 | 2.0 | -    | Glycosyltransferase                                                                         |
| CIBE_5292         | 6up | 3.1 | 1.8 | 1.5 | 0.6 | -    | conserved protein of unknown function                                                       |
| CIBE_1367         | 6up | 1.5 | 1.8 | 1.9 | 1.7 | phoU | Phosphate-specific transport system accessory protein PhoU homolog                          |
| CIBE_4731         | 6up | 2.8 | 2.0 | 1.6 | 0.5 | -    | Acetyltransferase                                                                           |
| CIBE_3786         | 6up | 2.0 | 1.9 | 1.4 | 1.7 | -    | Ser/Thr phosphatase family protein                                                          |
| CIBE_1357         | 6up | 1.8 | 2.2 | 1.5 | 1.4 | sigG | RNA polymerase sporulation-specific sigma factor (sigma-G)                                  |
| CIBE_2403         | 6up | 1.6 | 1.8 | 2.0 | 1.6 | hyuA | D-stereospecific phenylhydantoinase                                                         |
| CIBE_4820         | 6up | 2.4 | 2.0 | 1.6 | 0.9 | pepO | Neutral endopeptidase PepO                                                                  |
| CIBE_2751         | 6up | 1.7 | 1.3 | 1.7 | 2.1 | yxjH | putative methyl-tetrahydrofolate methyltransferase                                          |
| CIBE_2420         | 6up | 2.7 | 1.8 | 1.3 | 1.0 | -    | Molybdopterin binding domain                                                                |
| CIBE_0299         | 6up | 1.8 | 1.7 | 1.9 | 1.4 | -    | conserved protein of unknown function                                                       |
| CIBE_3910         | 6up | 2.9 | 1.7 | 1.2 | 0.9 | -    | protein of unknown function                                                                 |
| CIBE_1633         | 6up | 0.7 | 2.2 | 2.3 | 1.6 | -    | Pyruvate kinase                                                                             |
| CIBE_3202         | 6up | 2.9 | 1.5 | 1.1 | 1.3 | -    | Valyl-tRNA synthetase (fragment)                                                            |
| CIBE_p0012        | 6up | 2.8 | 2.0 | 0.9 | 1.0 | -    | conserved protein of unknown function                                                       |
| CIBE_4173         | 6up | 2.7 | 1.9 | 1.1 | 1.1 | -    | Abortive infection protein                                                                  |
| CIBE_4540         | 6up | 1.8 | 1.7 | 2.0 | 1.3 | -    | Membrane protein                                                                            |
| CIBE_4251         | 6up | 3.0 | 1.5 | 0.9 | 1.3 | -    | conserved protein of unknown function                                                       |
| CIBE_0481         | 6up | 2.2 | 2.5 | 0.9 | 1.1 | -    | protein of unknown function                                                                 |
| CIBE_3195         | 6up | 2.8 | 1.5 | 0.9 | 1.4 | -    | Homocysteine S-methyltransferase                                                            |
| CIBE_3788         | 6up | 2.9 | 1.8 | 1.1 | 0.7 | -    | protein of unknown function                                                                 |
| CIBE_3246         | 6up | 2.4 | 1.5 | 1.2 | 1.5 | -    | Carboxymuconolactone decarboxylase                                                          |
| CIBE_0218         | 6up | 0.4 | 2.4 | 2.0 | 1.8 | -    | Cell wall hydrolase, SleB                                                                   |
| CIBE_2419         | 6up | 2.3 | 1.7 | 1.3 | 1.3 | -    | LysR family transcriptional regulator                                                       |
| CIBE_4322         | 6up | 2.0 | 1.6 | 1.6 | 1.4 | -    | conserved exported protein of unknown function                                              |
| CIBE_1363         | 6up | 1.6 | 1.6 | 1.7 | 1.6 | pstS | phosphate ABC transporter (binding lipoprotein)                                             |
| CIBE_misc_RNA_2   | 6up | 1.5 | 1.7 | 1.1 | 2.2 | -    | 6S                                                                                          |
| CIBE_misc_RNA_44  | 6up | 1.8 | 1.9 | 1.7 | 1.2 | -    | Purine                                                                                      |
| CIBE_4170         | 6up | 2.0 | 1.5 | 1.4 | 1.6 | -    | conserved protein of unknown function                                                       |
| CIBE_2964         | 6up | 1.7 | 2.1 | 1.5 | 1.2 | -    | Aldehyde dehydrogenase                                                                      |
| CIBE_misc_RNA_11f | 6up | 1.5 | 1.5 | 1.2 | 2.3 | -    | Glycine                                                                                     |
| CIBE_2418         | 6up | 1.8 | 1.7 | 1.9 | 1.1 | -    | Molybdopterin dehydrogenase, FAD-binding                                                    |
| CIBE_0799         | 6up | 0.7 | 2.3 | 2.1 | 1.4 | -    | 2', 3'-cyclic nucleotide 2'-phosphodiesterase                                               |
| CIBE_0476         | 6up | 2.4 | 2.5 | 0.8 | 0.7 | -    | protein of unknown function                                                                 |
| CIBE_3446         | 6up | 1.8 | 1.9 | 1.7 | 1.1 | -    | conserved protein of unknown function                                                       |
| CIBE_2132         | 6up | 1.6 | 1.6 | 1.9 | 1.3 | -    | Single-stranded DNA-binding protein                                                         |
| CIBE_0482         | 6up | 2.4 | 2.5 | 0.8 | 0.6 | -    | protein of unknown function                                                                 |

|                  |     |     |     |     |      |       |                                                                                          |
|------------------|-----|-----|-----|-----|------|-------|------------------------------------------------------------------------------------------|
| CIBE_4468        | 6up | 1.9 | 1.6 | 1.5 | 1.4  | lacA  | Galactoside O-acetyltransferase                                                          |
| CIBE_p0013       | 6up | 2.7 | 1.5 | 1.2 | 0.9  | -     | conserved protein of unknown function                                                    |
| CIBE_5803        | 6up | 1.7 | 1.4 | 1.4 | 1.8  | -     | conserved protein of unknown function                                                    |
| CIBE_5305        | 6up | 2.4 | 1.5 | 1.4 | 1.0  | -     | conserved protein of unknown function                                                    |
| CIBE_4198        | 6up | 2.4 | 1.7 | 1.2 | 0.9  | -     | Acetyltransferase, GNAT family                                                           |
| CIBE_4323        | 6up | 2.1 | 1.5 | 1.4 | 1.2  | -     | conserved exported protein of unknown function                                           |
| CIBE_4174        | 6up | 2.7 | 1.8 | 1.1 | 0.6  | -     | Methyltransferase type 12                                                                |
| CIBE_4733        | 6up | 3.1 | 1.9 | 1.1 | 0.0  | -     | Phosphinothricin N-acetyltransferase                                                     |
| CIBE_0471        | 6up | 2.3 | 2.4 | 0.7 | 0.8  | -     | conserved protein of unknown function                                                    |
| CIBE_0444        | 6up | 2.6 | 2.1 | 0.7 | 0.7  | -     | conserved protein of unknown function                                                    |
| CIBE_2826        | 6up | 1.8 | 2.3 | 1.1 | 0.8  | glnH  | glutamine transporter subunit ; periplasmic binding component of ABC superfamily         |
| CIBE_0250        | 6up | 0.4 | 1.8 | 2.0 | 1.9  | -     | Extracellular solute-binding protein, family 1                                           |
| CIBE_2017        | 6up | 0.8 | 2.7 | 1.4 | 1.2  | -     | conserved protein of unknown function                                                    |
| CIBE_3870        | 6up | 2.7 | 1.7 | 1.1 | 0.6  | -     | Histidine triad (HIT) protein                                                            |
| CIBE_3168        | 6up | 2.8 | 2.3 | 0.8 | 0.2  | -     | conserved membrane protein of unknown function                                           |
| CIBE_2878        | 6up | 1.7 | 1.3 | 1.5 | 1.6  | -     | Phospho-2-dehydro-3-deoxyheptonate aldolase                                              |
| CIBE_3782        | 6up | 2.7 | 1.4 | 1.0 | 1.0  | -     | Acetyltransferase, GNAT family (fragment)                                                |
| CIBE_4171        | 6up | 2.3 | 1.6 | 1.1 | 1.1  | -     | exported protein of unknown function                                                     |
| CIBE_3324        | 6up | 2.1 | 1.7 | 1.1 | 1.2  | -     | conserved protein of unknown function                                                    |
| CIBE_3193        | 6up | 2.6 | 1.2 | 1.3 | 0.9  | -     | conserved protein of unknown function                                                    |
| CIBE_3287        | 6up | 2.5 | 1.7 | 1.5 | 0.3  | -     | putative cell wall binding repeat-containing protein                                     |
| CIBE_4466        | 6up | 2.3 | 1.6 | 1.4 | 0.7  | -     | conserved protein of unknown function                                                    |
| CIBE_0470        | 6up | 2.2 | 2.5 | 0.6 | 0.6  | -     | conserved protein of unknown function                                                    |
| CIBE_0537        | 6up | 0.6 | 2.2 | 1.8 | 1.4  | -     | conserved protein of unknown function                                                    |
| CIBE_3640        | 6up | 1.8 | 1.8 | 1.1 | 1.3  | -     | conserved protein of unknown function                                                    |
| CIBE_2404        | 6up | 1.6 | 1.6 | 1.8 | 0.8  | -     | YheO domain protein                                                                      |
| CIBE_3436        | 6up | 2.5 | 1.6 | 0.9 | 0.9  | -     | Electron transfer flavoprotein, alpha/beta-subunit-like protein                          |
| CIBE_4413        | 6up | 0.6 | 2.5 | 1.7 | 1.2  | -     | conserved protein of unknown function                                                    |
| CIBE_5285        | 6up | 2.7 | 1.8 | 1.1 | 0.4  | -     | conserved protein of unknown function                                                    |
| CIBE_1820        | 6up | 2.0 | 2.1 | 1.4 | 0.5  | -     | conserved protein of unknown function                                                    |
| CIBE_4252        | 6up | 2.7 | 1.4 | 0.9 | 0.9  | -     | Radical SAM domain protein                                                               |
| CIBE_3471        | 6up | 2.3 | 1.4 | 1.3 | 0.7  | stc   | Signal-transduction and transcriptional-control protein                                  |
| CIBE_3899        | 6up | 2.2 | 1.7 | 1.1 | 0.8  | -     | Glyoxalase/bleomycin resistance protein/dioxygenase                                      |
| CIBE_3787        | 6up | 2.3 | 0.8 | 0.8 | 1.9  | -     | protein of unknown function                                                              |
| CIBE_0473        | 6up | 2.6 | 2.4 | 0.6 | 0.2  | -     | conserved protein of unknown function                                                    |
| CIBE_2417        | 6up | 1.7 | 1.5 | 1.6 | 1.1  | ndhS  | Nicotinate dehydrogenase small FeS subunit                                               |
| CIBE_0486        | 6up | 2.4 | 2.8 | 0.7 | -0.1 | -     | conserved protein of unknown function                                                    |
| CIBE_3340        | 6up | 2.3 | 1.3 | 1.1 | 1.1  | -     | Elongation factor G, domain IV                                                           |
| CIBE_3410        | 6up | 2.2 | 1.3 | 1.4 | 0.9  | opuCA | glycine betaine/carnitine/choline/choline sulfate ABC transporter (ATP-binding protein)  |
| CIBE_4467        | 6up | 1.9 | 1.4 | 1.5 | 0.9  | -     | conserved protein of unknown function                                                    |
| CIBE_2655        | 6up | 2.4 | 1.7 | 1.4 | 0.2  | -     | Flavodoxin                                                                               |
| CIBE_0828        | 6up | 2.2 | 1.9 | 0.9 | 0.7  | -     | putative AgrB-like protein 1                                                             |
| CIBE_3868        | 6up | 2.4 | 1.4 | 1.0 | 1.0  | -     | conserved protein of unknown function                                                    |
| CIBE_3249        | 6up | 2.2 | 1.1 | 1.5 | 1.0  | -     | Histidine kinase                                                                         |
| CIBE_4250        | 6up | 2.7 | 1.6 | 0.9 | 0.6  | -     | conserved protein of unknown function                                                    |
| CIBE_6019        | 6up | 2.5 | 1.6 | 1.4 | 0.2  | -     | Transcriptional regulator, RpiR family                                                   |
| CIBE_4139        | 6up | 2.8 | 1.8 | 0.9 | 0.3  | -     | Acetyltransferase                                                                        |
| CIBE_3347        | 6up | 2.1 | 1.5 | 1.0 | 1.2  | -     | ATPase AAA (fragment)                                                                    |
| CIBE_0943        | 6up | 2.0 | 0.8 | 0.8 | 2.0  | -     | O-acetylhomoserine aminocarboxypropyltransferase                                         |
| CIBE_2343        | 6up | 2.3 | 1.2 | 1.0 | 1.2  | fldZ  | 2-enoate reductase FldZ                                                                  |
| CIBE_3199        | 6up | 2.7 | 1.5 | 0.9 | 0.6  | -     | Nicotinamidase-like amidase                                                              |
| CIBE_3773        | 6up | 1.7 | 1.5 | 1.6 | 0.9  | -     | Accessory gene regulator B                                                               |
| CIBE_1022        | 6up | 0.5 | 2.0 | 1.9 | 1.2  | -     | conserved protein of unknown function                                                    |
| CIBE_3397        | 6up | 2.3 | 1.7 | 0.9 | 0.6  | -     | conserved protein of unknown function                                                    |
| CIBE_2171        | 6up | 2.5 | 2.1 | 0.4 | 0.6  | -     | RNA polymerase, sigma 28 subunit, FliA/WhiG family                                       |
| CIBE_3034        | 6up | 0.4 | 2.0 | 2.0 | 1.2  | -     | conserved protein of unknown function                                                    |
| CIBE_1036        | 6up | 0.5 | 2.1 | 1.8 | 1.2  | -     | Spore coat protein CotS                                                                  |
| CIBE_1458        | 6up | 1.2 | 2.8 | 0.9 | 0.8  | -     | conserved protein of unknown function                                                    |
| CIBE_4773        | 6up | 2.0 | 1.1 | 1.4 | 1.1  | -     | conserved protein of unknown function                                                    |
| CIBE_5284        | 6up | 2.3 | 1.4 | 0.9 | 0.9  | -     | Wall-associated protein WapA (fragment)                                                  |
| CIBE_4253        | 6up | 2.4 | 1.5 | 0.9 | 0.8  | -     | 2-dehydropanoate 2-reductase                                                             |
| CIBE_misc_RNA_61 | 6up | 2.3 | 1.9 | 0.6 | 0.8  | -     | Intron_gpl                                                                               |
| CIBE_4444        | 6up | 2.0 | 1.2 | 1.2 | 1.2  | -     | MarR family transcriptional regulator                                                    |
| CIBE_2825        | 6up | 2.3 | 2.6 | 0.6 | 0.0  | -     | GntR family transcriptional regulator                                                    |
| CIBE_4197        | 6up | 2.3 | 1.5 | 1.0 | 0.7  | -     | cAMP-binding protein                                                                     |
| CIBE_3789        | 6up | 2.3 | 1.4 | 1.1 | 0.7  | -     | conserved protein of unknown function                                                    |
| CIBE_3962        | 6up | 2.3 | 1.5 | 1.0 | 0.7  | bgfF  | fused beta-glucoside-specific PTS enzymes: IIA component ; IIB component ; IIC component |
| CIBE_4196        | 6up | 1.8 | 1.5 | 1.0 | 1.1  | -     | Short-chain dehydrogenase                                                                |
| CIBE_2591        | 6up | 2.5 | 2.1 | 0.5 | 0.4  | -     | conserved protein of unknown function                                                    |
| CIBE_0897        | 6up | 2.0 | 1.5 | 0.8 | 1.1  | -     | Carbohydrate ABC transporter membrane protein 1, CUT1 family                             |
| CIBE_0104        | 6up | 0.4 | 2.2 | 1.6 | 1.2  | -     | Spore cortex biosynthesis protein YabQ                                                   |
| CIBE_4137        | 6up | 2.7 | 1.6 | 1.0 | 0.1  | -     | conserved protein of unknown function                                                    |
| CIBE_3826        | 6up | 2.9 | 2.0 | 0.4 | 0.0  | -     | HAD hydrolase, family IA, variant 3                                                      |
| CIBE_4090        | 6up | 1.6 | 1.5 | 1.6 | 0.7  | -     | Cell wall-binding protein                                                                |
| CIBE_1638        | 6up | 1.7 | 1.7 | 1.4 | 0.5  | -     | Appr-1-p processing domain protein                                                       |
| CIBE_0464        | 6up | 2.6 | 2.6 | 0.4 | -0.2 | -     | conserved protein of unknown function                                                    |
| CIBE_0477        | 6up | 2.2 | 2.3 | 0.6 | 0.3  | -     | protein of unknown function                                                              |
| CIBE_3902        | 6up | 2.2 | 1.1 | 0.6 | 1.3  | -     | protein of unknown function                                                              |
| CIBE_3338        | 6up | 1.8 | 1.3 | 1.1 | 1.2  | -     | Transcription activator, effector binding                                                |
| CIBE_5293        | 6up | 3.1 | 1.3 | 1.2 | -0.2 | -     | conserved membrane protein of unknown function                                           |
| CIBE_2782        | 6up | 2.2 | 1.3 | 1.0 | 0.7  | -     | protein of unknown function                                                              |
| CIBE_4735        | 6up | 2.6 | 1.5 | 1.2 | 0.0  | -     | putative lipoprotein                                                                     |
| CIBE_b0020       | 6up | 2.0 | 1.9 | 1.0 | 0.3  | -     | protein of unknown function                                                              |
| CIBE_4607        | 6up | 2.8 | 2.2 | 2.3 | 2.4  | yodS  | putative aminoacylate CoA-transferase                                                    |
| CIBE_3901        | 6up | 2.0 | 1.6 | 1.1 | 0.5  | -     | putative cell wall binding repeat-containing protein                                     |
| CIBE_4712        | 6up | 2.0 | 1.4 | 0.9 | 0.9  | -     | conserved protein of unknown function                                                    |
| CIBE_3911        | 6up | 2.7 | 1.4 | 1.0 | 0.1  | -     | Putative cell wall binding repeat protein (fragment)                                     |
| CIBE_5268        | 6up | 2.0 | 1.2 | 0.9 | 1.1  | -     | conserved protein of unknown function                                                    |
| CIBE_4140        | 6up | 2.7 | 1.7 | 0.4 | 0.4  | -     | conserved membrane protein of unknown function                                           |
| CIBE_3871        | 6up | 2.6 | 1.4 | 1.2 | 0.0  | -     | conserved protein of unknown function                                                    |
| CIBE_4136        | 6up | 2.6 | 1.4 | 0.7 | 0.4  | -     | Transcriptional regulator, HxlR family                                                   |

|            |     |     |     |      |      |       |                                                                   |
|------------|-----|-----|-----|------|------|-------|-------------------------------------------------------------------|
| CIBE_0450  | 6up | 2.3 | 2.0 | 0.4  | 0.5  | -     | conserved protein of unknown function                             |
| CIBE_2172  | 6up | 2.2 | 1.5 | 0.8  | 0.6  | -     | conserved protein of unknown function                             |
| CIBE_4143  | 6up | 3.0 | 2.1 | 0.7  | -0.7 | -     | ABC transporter related (fragment)                                |
| CIBE_3368  | 6up | 1.8 | 1.4 | 1.2  | 0.6  | -     | putative membrane protein                                         |
| CIBE_0472  | 6up | 2.1 | 2.1 | 0.6  | 0.3  | -     | Minor capsid                                                      |
| CIBE_1572  | 6up | 1.7 | 1.2 | 0.9  | 1.2  | hisB  | imidazoleglycerol-phosphate dehydratase                           |
| CIBE_3903  | 6up | 2.4 | 1.4 | 0.7  | 0.5  | -     | conserved protein of unknown function                             |
| CIBE_3639  | 6up | 2.0 | 1.6 | 1.3  | 0.1  | -     | GCN5-related N-acetyltransferase                                  |
| CIBE_2421  | 6up | 2.5 | 1.4 | 0.7  | 0.3  | moaA  | Cyclic pyranopterin monophosphate synthase                        |
| CIBE_4316  | 6up | 2.1 | 0.9 | 0.8  | 1.2  | -     | conserved exported protein of unknown function                    |
| CIBE_4608  | 6up | 3.1 | 2.5 | 2.4  | 2.8  | yodR  | putative acylate-acetoacetate CoA-transferase                     |
| CIBE_0075  | 6up | 1.8 | 1.1 | 1.1  | 1.0  | leuA  | 2-isopropylmalate synthase 2                                      |
| CIBE_2021  | 6up | 1.6 | 2.4 | 0.8  | 0.2  | -     | Stage III sporulation protein AB                                  |
| CIBE_4445  | 6up | 1.7 | 1.3 | 1.1  | 0.9  | -     | Beta-lactamase                                                    |
| CIBE_5457  | 6up | 2.3 | 1.2 | 0.2  | 1.3  | yrbE  | putative oxidoreductase                                           |
| CIBE_3980  | 6up | 2.1 | 1.9 | 0.8  | 0.1  | -     | conserved protein of unknown function                             |
| CIBE_1281  | 6up | 1.9 | 1.0 | 0.4  | 1.6  | -     | ABC transporter                                                   |
| CIBE_1570  | 6up | 1.5 | 0.9 | 1.3  | 1.2  | hisD  | histidinol dehydrogenase                                          |
| CIBE_6076  | 6up | 2.1 | 1.1 | 1.3  | 0.4  | -     | Acyl-CoA dehydrogenase                                            |
| CIBE_3245  | 6up | 2.1 | 1.3 | 0.1  | 1.4  | -     | PAS/PAC sensor signal transduction histidine kinase               |
| CIBE_0438  | 6up | 2.2 | 2.0 | 0.4  | 0.3  | -     | protein of unknown function                                       |
| CIBE_0994  | 6up | 2.5 | 1.5 | 0.5  | 0.3  | sigF  | RNA polymerase sporulation-specific sigma factor (sigma-F)        |
| CIBE_3000  | 6up | 2.0 | 1.1 | 0.9  | 0.7  | -     | Intermediate filament protein:ATP/GTP-binding site motif A        |
| CIBE_1450  | 6up | 0.2 | 1.7 | 1.6  | 1.3  | tepA  | protein export-enhancing protease                                 |
| CIBE_1240  | 6up | 1.7 | 1.0 | 1.1  | 0.9  | ilvE  | Branched-chain-amino-acid aminotransferase                        |
| CIBE_0055  | 6up | 0.4 | 1.9 | 1.5  | 0.9  | -     | Spore maturation protein                                          |
| CIBE_4472  | 6up | 2.5 | 1.5 | 0.6  | 0.1  | dkgB  | 2,5-diketo-D-gluconic acid reductase B                            |
| CIBE_1794  | 6up | 2.1 | 2.0 | 0.4  | 0.2  | -     | conserved protein of unknown function                             |
| CIBE_3780  | 6up | 2.0 | 1.3 | 0.9  | 0.5  | -     | membrane protein of unknown function                              |
| CIBE_2201  | 6up | 1.7 | 1.1 | 0.9  | 0.9  | -     | DegV domain-containing protein CA_C1624                           |
| CIBE_5267  | 6up | 1.9 | 1.1 | 0.7  | 1.0  | -     | YD repeat protein                                                 |
| CIBE_0475  | 6up | 2.3 | 2.3 | 0.2  | -0.1 | -     | Bacteriophage Gp15 protein                                        |
| CIBE_0551  | 6up | 1.3 | 2.3 | 0.8  | 0.3  | -     | conserved protein of unknown function                             |
| CIBE_3869  | 6up | 2.2 | 0.9 | 0.6  | 0.9  | -     | Metal-dependent phosphohydrolase HD sub domain containing protein |
| CIBE_5423  | 6up | 1.6 | 1.4 | 1.1  | 0.5  | argC  | N-acetylglutamate gamma-semialdehyde dehydrogenase                |
| CIBE_5270  | 6up | 1.9 | 1.1 | 0.8  | 0.8  | -     | Pentapeptide repeat protein                                       |
| CIBE_4183  | 6up | 1.9 | 1.4 | 0.7  | 0.5  | -     | Ketopantoate reductase ApbA/PanE, N-terminal domain protein       |
| CIBE_3908  | 6up | 2.4 | 1.6 | 0.6  | -0.2 | -     | Cyanophycinase                                                    |
| CIBE_0918  | 6up | 2.5 | 1.8 | 0.1  | 0.1  | -     | ErfK/YbiS/YcfS/YnhG family protein                                |
| CIBE_1608  | 6up | 0.2 | 1.8 | 1.4  | 1.1  | -     | Membrane protein                                                  |
| CIBE_3790  | 6up | 1.9 | 1.4 | 1.1  | 0.0  | -     | conserved protein of unknown function                             |
| CIBE_3396  | 6up | 2.0 | 1.3 | 0.8  | 0.3  | -     | conserved protein of unknown function                             |
| CIBE_0076  | 6up | 2.2 | 0.9 | 0.8  | 0.5  | -     | Aconitate hydratase                                               |
| CIBE_3877  | 6up | 2.2 | 1.1 | 0.9  | 0.2  | -     | conserved protein of unknown function                             |
| CIBE_5882  | 6up | 2.1 | 1.6 | 0.4  | 0.3  | -     | conserved protein of unknown function                             |
| CIBE_2932  | 6up | 2.0 | 1.3 | 0.5  | 0.6  | -     | protein of unknown function                                       |
| CIBE_3201  | 6up | 2.4 | 1.0 | 0.7  | 0.4  | -     | conserved protein of unknown function                             |
| CIBE_3367  | 6up | 1.8 | 1.1 | 1.0  | 0.5  | -     | putative cell wall binding protein                                |
| CIBE_0479  | 6up | 1.9 | 2.0 | 0.4  | 0.0  | -     | Phage minor structural protein (modular protein)                  |
| CIBE_5271  | 6up | 1.7 | 1.0 | 0.9  | 0.7  | -     | conserved protein of unknown function                             |
| CIBE_p0004 | 6up | 1.7 | 1.5 | 0.8  | 0.3  | -     | Putative cell wall binding protein (fragment)                     |
| CIBE_1609  | 6up | 2.3 | 1.4 | 0.4  | 0.2  | -     | conserved protein of unknown function                             |
| CIBE_0992  | 6up | 2.4 | 1.3 | 0.6  | 0.0  | spolI | Anti-sigma F factor antagonist                                    |
| CIBE_1686  | 6up | 1.9 | 1.3 | 0.5  | 0.6  | kdpB  | potassium translocating ATPase, subunit B                         |
| CIBE_3185  | 6up | 1.6 | 1.1 | 1.0  | 0.6  | -     | conserved protein of unknown function                             |
| CIBE_6075  | 6up | 2.1 | 1.0 | 1.0  | 0.1  | -     | Beta-lactamase domain protein                                     |
| CIBE_4279  | 6up | 2.4 | 0.8 | 0.5  | 0.5  | -     | conserved protein of unknown function                             |
| CIBE_4736  | 6up | 2.3 | 1.6 | 0.7  | -0.3 | -     | conserved protein of unknown function                             |
| CIBE_3236  | 6up | 1.8 | 1.3 | 0.6  | 0.5  | -     | Alpha/beta hydrolase fold protein                                 |
| CIBE_3395  | 6up | 2.1 | 0.9 | 1.0  | 0.1  | -     | N-acetylmuramoyl-L-alanine amidase family 2                       |
| CIBE_5280  | 6up | 1.6 | 0.9 | 1.2  | 0.5  | ymdB  | conserved hypothetical protein                                    |
| CIBE_4182  | 6up | 2.0 | 1.3 | 0.7  | 0.2  | -     | DNA mismatch repair protein MutS domain protein                   |
| CIBE_0487  | 6up | 2.1 | 2.1 | 0.4  | -0.4 | -     | conserved protein of unknown function                             |
| CIBE_1611  | 6up | 2.0 | 1.3 | 0.4  | 0.6  | -     | conserved exported protein of unknown function                    |
| CIBE_0457  | 6up | 1.7 | 1.7 | 0.4  | 0.3  | -     | conserved protein of unknown function                             |
| CIBE_5283  | 6up | 2.0 | 1.4 | 0.5  | 0.2  | -     | putative transcriptional regulatory protein, AsnC family          |
| CIBE_4142  | 6up | 2.5 | 1.2 | 0.3  | 0.0  | -     | ABC transporter (fragment)                                        |
| CIBE_1573  | 6up | 1.6 | 0.9 | 0.9  | 0.7  | hisH  | amidotransferase (glutaminase)                                    |
| CIBE_5881  | 6up | 1.8 | 1.3 | 0.5  | 0.5  | acpS  | holo-acyl carrier protein synthase                                |
| CIBE_0478  | 6up | 1.9 | 2.2 | 0.6  | -0.6 | -     | putative Phage tail component                                     |
| CIBE_1335  | 6up | 1.6 | 1.5 | 0.9  | 0.0  | -     | conserved protein of unknown function                             |
| CIBE_4135  | 6up | 2.4 | 1.1 | 0.5  | 0.1  | -     | Phosphatidylethanolamine-binding protein                          |
| CIBE_0467  | 6up | 2.1 | 2.0 | 0.2  | -0.3 | -     | protein of unknown function                                       |
| CIBE_4734  | 6up | 2.1 | 1.2 | 0.7  | 0.1  | -     | conserved membrane protein of unknown function                    |
| CIBE_3290  | 6up | 1.7 | 1.2 | 0.7  | 0.4  | -     | conserved exported protein of unknown function                    |
| CIBE_4138  | 6up | 2.3 | 1.4 | 0.6  | -0.3 | -     | conserved membrane protein of unknown function                    |
| CIBE_1487  | 6up | 2.2 | 1.0 | 0.0  | 0.7  | -     | conserved protein of unknown function                             |
| CIBE_2304  | 6up | 2.0 | 0.9 | 0.6  | 0.5  | -     | conserved protein of unknown function                             |
| CIBE_0289  | 6up | 1.5 | 1.0 | 1.0  | 0.5  | rbr   | Rubryerythrin                                                     |
| CIBE_2931  | 6up | 2.0 | 1.5 | 0.5  | 0.0  | -     | conserved protein of unknown function                             |
| CIBE_0461  | 6up | 2.0 | 1.9 | 0.2  | -0.2 | -     | conserved protein of unknown function                             |
| CIBE_4009  | 6up | 1.9 | 1.7 | 0.3  | 0.0  | -     | Membrane protein                                                  |
| CIBE_5425  | 6up | 1.5 | 1.3 | 0.9  | 0.2  | argB  | Acetylglutamate kinase                                            |
| CIBE_3409  | 6up | 1.7 | 0.9 | 0.9  | 0.4  | -     | ABC transporter permease                                          |
| CIBE_0468  | 6up | 2.2 | 2.1 | 0.0  | -0.4 | -     | Phage coat protein                                                |
| CIBE_4134  | 6up | 2.2 | 1.3 | 0.3  | 0.1  | -     | GCN5 family acetyltransferase                                     |
| CIBE_5458  | 6up | 1.7 | 1.0 | 0.5  | 0.6  | iolD  | 3D-(3,5/4)-trihydroxycyclohexane-1,2-dione hydrolase              |
| CIBE_0445  | 6up | 2.1 | 1.6 | -0.1 | 0.2  | -     | Gp49 homologous (fragment)                                        |
| CIBE_1162  | 6up | 2.2 | 0.4 | 0.9  | 0.4  | -     | Polysaccharide biosynthesis protein                               |
| CIBE_3905  | 6up | 1.8 | 0.9 | 0.6  | 0.6  | -     | Alpha/beta hydrolase fold                                         |
| CIBE_1398  | 6up | 0.4 | 2.1 | 0.9  | 0.4  | -     | Sporulation integral membrane protein YlbJ                        |

|                  |       |      |      |      |      |         |                                                                                     |
|------------------|-------|------|------|------|------|---------|-------------------------------------------------------------------------------------|
| CIBE_4367        | 6up   | 1.9  | 1.4  | 0.6  | -0.1 | -       | DNA mismatch repair protein MutS (fragment)                                         |
| CIBE_2568        | 6up   | 2.1  | 1.7  | 0.2  | -0.3 | -       | putative cell wall binding repeat-containing protein                                |
| CIBE_0896        | 6up   | 2.0  | 1.4  | 0.7  | -0.4 | -       | ABC transporter substrate-binding protein                                           |
| CIBE_3784        | 6up   | 2.1  | 0.9  | 0.5  | 0.0  | -       | protein of unknown function                                                         |
| CIBE_3281        | 6up   | 1.9  | 1.3  | 0.2  | 0.1  | gldA    | glycerol dehydrogenase, NAD                                                         |
| CIBE_3342        | 6up   | 1.9  | 0.7  | 0.5  | 0.3  | -       | conserved protein of unknown function                                               |
| CIBE_0469        | 6up   | 2.0  | 2.1  | -0.1 | -0.4 | -       | conserved protein of unknown function                                               |
| CIBE_3893        | 6up   | 2.0  | 0.9  | 0.6  | 0.0  | pspB    | putative phosphoserine phosphatase 2                                                |
| CIBE_4609        | 6up   | 3.2  | 2.4  | 2.3  | 2.7  | adc     | Acetoacetate decarboxylase                                                          |
| CIBE_0993        | 6up   | 2.3  | 1.1  | 0.3  | -0.2 | spoIIAB | anti-sigma factor (antagonist of sigma(F)) and serine kinase                        |
| CIBE_2043        | 6up   | 1.7  | 1.2  | 0.5  | 0.1  | -       | conserved protein of unknown function                                               |
| CIBE_0474        | 6up   | 2.0  | 1.8  | -0.1 | -0.3 | -       | conserved protein of unknown function                                               |
| CIBE_3894        | 6up   | 2.1  | 1.2  | 0.5  | -0.4 | -       | ADP-ribose pyrophosphatase                                                          |
| CIBE_0594        | 6up   | 1.6  | 1.9  | 0.0  | -0.1 | -       | conserved membrane protein of unknown function                                      |
| CIBE_0867        | 6up   | 1.7  | 0.7  | 0.4  | 0.5  | -       | Histidine kinase                                                                    |
| CIBE_3172        | 6up   | 2.2  | 1.5  | 0.5  | -1.0 | -       | conserved protein of unknown function                                               |
| CIBE_0751        | 6up   | 1.7  | 1.0  | 0.4  | 0.2  | nth     | Endonuclease III                                                                    |
| CIBE_4366        | 6up   | 1.7  | 1.1  | 0.2  | 0.2  | -       | DNA mismatch repair protein MutS (fragment)                                         |
| CIBE_3233        | 6up   | 1.9  | 1.1  | 0.6  | -0.4 | -       | conserved protein of unknown function                                               |
| CIBE_3811        | 6up   | 1.9  | 0.8  | 0.4  | 0.0  | -       | Fumarylacetoacetate (FAA) hydrolase                                                 |
| CIBE_1605        | 6up   | 0.4  | 2.0  | 0.7  | 0.0  | -       | Sporulation protein SpoVB                                                           |
| CIBE_0462        | 6up   | 1.6  | 1.6  | 0.2  | -0.2 | -       | putative SPP1 gp7 family phage head morphogenesis protein                           |
| CIBE_2040        | 6up   | 3.0  | 0.9  | -0.3 | -0.6 | -       | protein of unknown function                                                         |
| CIBE_0416        | 6up   | 1.9  | 1.0  | 0.2  | -0.1 | -       | Two component regulator three Y domain protein                                      |
| CIBE_2305        | 6up   | 1.8  | 0.5  | 0.3  | 0.3  | -       | Methyl-accepting chemotaxis protein                                                 |
| CIBE_3892        | 6up   | 2.2  | 0.6  | 0.2  | -0.2 | -       | conserved protein of unknown function                                               |
| CIBE_4975        | 6up   | 1.8  | 0.9  | 0.1  | 0.1  | hsp     | 18 kDa heat shock protein                                                           |
| CIBE_0277        | 6up   | 1.9  | 0.8  | 0.8  | -0.5 | -       | Cyclase                                                                             |
| CIBE_0357        | 6up   | 2.0  | 0.8  | 0.0  | 0.0  | -       | protein of unknown function                                                         |
| CIBE_4848        | 6up   | 2.1  | 1.1  | 0.1  | -0.5 | -       | Methyl-accepting chemotaxis sensory transducer                                      |
| CIBE_2629        | 6up   | 1.5  | 1.2  | 0.3  | -0.2 | -       | conserved protein of unknown function                                               |
| CIBE_5615        | 6up   | 1.8  | 0.9  | -0.1 | 0.2  | -       | Cell wall hydrolase                                                                 |
| CIBE_2933        | 6up   | 1.8  | 0.7  | 0.2  | 0.1  | -       | conserved protein of unknown function                                               |
| CIBE_5880        | 6up   | 2.1  | 1.1  | -0.1 | -0.3 | -       | Carbohydrate kinase                                                                 |
| CIBE_0488        | 6up   | 1.7  | 1.9  | -0.3 | -0.7 | -       | Glycoside hydrolase, family 25                                                      |
| CIBE_3984        | 6up   | 1.6  | 0.7  | 0.1  | 0.2  | -       | conserved protein of unknown function                                               |
| CIBE_4984        | 6up   | 1.6  | 0.7  | 0.4  | 0.0  | -       | Alpha amylase, catalytic region                                                     |
| CIBE_3783        | 6up   | 1.8  | 0.7  | 0.3  | -0.2 | -       | conserved protein of unknown function                                               |
| CIBE_2783        | 6up   | 1.7  | 0.5  | 0.6  | -0.2 | -       | conserved protein of unknown function                                               |
| CIBE_1355        | 6up   | 1.5  | 1.6  | 0.0  | -0.5 | -       | Peptidase U4                                                                        |
| CIBE_2168        | 6up   | 1.6  | 0.7  | 0.3  | 0.0  | -       | ATP-dependent DNA helicase RecQ                                                     |
| CIBE_0435        | 6up   | 1.6  | 1.3  | 0.2  | -0.6 | -       | conserved protein of unknown function                                               |
| CIBE_0974        | 6up   | 1.9  | 1.0  | 0.1  | -0.6 | -       | Universal stress protein                                                            |
| CIBE_0466        | 6up   | 1.8  | 1.8  | -0.4 | -1.0 | -       | conserved protein of unknown function                                               |
| CIBE_4280        | 6up   | 1.9  | 0.8  | 0.3  | -0.6 | -       | Metallo-beta-lactamase superfamily protein                                          |
| CIBE_4435        | 6up   | 1.8  | 0.9  | 0.6  | -1.0 | -       | conserved protein of unknown function                                               |
| CIBE_5924        | 6up   | 1.8  | 0.8  | 0.0  | -0.4 | glgC    | glucose-1-phosphate adenyltransferase (ADP-glucose pyrophosphorylase) subunit alpha |
| CIBE_2041        | 6up   | 2.0  | 0.6  | -0.1 | -0.3 | spo0A   | response regulator                                                                  |
| CIBE_0456        | 6up   | 0.9  | 1.6  | -0.5 | 0.3  | -       | conserved protein of unknown function                                               |
| CIBE_4732        | 6up   | 2.1  | 1.2  | 0.1  | -1.2 | lepB    | Signal peptidase I                                                                  |
| CIBE_0831        | 6up   | 1.5  | 0.6  | 0.1  | 0.0  | sudA    | Sulfide dehydrogenase subunit alpha                                                 |
| CIBE_5056        | 6up   | 2.0  | 0.5  | 0.2  | -0.6 | -       | Isocitrate dehydrogenase [NADP]                                                     |
| CIBE_4859        | 6up   | 1.8  | 0.7  | -0.2 | -0.3 | -       | Cell wall hydrolase/autolysin                                                       |
| CIBE_0088        | 6up   | 1.5  | 0.7  | 0.1  | -0.4 | -       | protein of unknown function                                                         |
| CIBE_0307        | 6up   | 1.8  | 0.4  | 0.1  | -0.3 | -       | Two component transcriptional regulator, LytTR family                               |
| CIBE_2617        | 6up   | 1.9  | 1.0  | 0.1  | -1.0 | -       | conserved protein of unknown function                                               |
| CIBE_3978        | 6up   | 1.8  | 1.1  | -0.4 | -0.7 | -       | conserved protein of unknown function                                               |
| CIBE_5925        | 6up   | 1.6  | 0.5  | -0.2 | -0.2 | -       | Alpha-amylase                                                                       |
| CIBE_3846        | 6up   | 1.6  | 0.4  | 0.1  | -0.5 | thrZ    | threonyl-tRNA synthetase                                                            |
| CIBE_5923        | 6up   | 1.9  | 0.7  | -0.3 | -0.8 | -       | Glucose-1-phosphate adenyltransferase                                               |
| CIBE_0279        | 6up   | 2.2  | 0.3  | 0.6  | -1.8 | -       | Methyl-accepting chemotaxis sensory transducer                                      |
| CIBE_0628        | 6up   | 1.7  | 0.4  | -0.3 | -0.6 | -       | protein of unknown function                                                         |
| CIBE_0436        | 6up   | 1.5  | 1.1  | -0.7 | -0.8 | -       | Excisionase family                                                                  |
| CIBE_3001        | 6up   | 1.6  | 0.1  | -0.2 | -0.4 | ftnA    | Ferritin                                                                            |
| CIBE_0465        | 6up   | 1.8  | 1.5  | -0.6 | -1.6 | -       | protein of unknown function                                                         |
| CIBE_2317        | 6up   | 1.2  | 1.2  | -0.5 | -1.0 | -       | conserved protein of unknown function                                               |
| CIBE_3891        | 6up   | 2.0  | 0.3  | -0.4 | -1.0 | -       | conserved membrane protein of unknown function                                      |
| CIBE_0278        | 6up   | 1.9  | 0.0  | 0.3  | -2.5 | -       | Transcriptional regulator                                                           |
| CIBE_tRNA57      | 6down | -1.7 | -1.4 | -0.1 | 0.4  | -       | Ala tRNA                                                                            |
| CIBE_4931        | 6down | -1.7 | -1.2 | -0.4 | -0.3 | ydaO    | Uncharacterized amino acid permease YdaO                                            |
| CIBE_1058        | 6down | -1.6 | -0.5 | -0.9 | -0.9 | amtB    | ammonium transporter                                                                |
| CIBE_misc_RNA_81 | 6down | -1.6 | -1.5 | -0.9 | -0.4 | -       | T-box                                                                               |
| CIBE_5854        | 6down | -1.6 | -1.2 | -0.9 | -0.8 | -       | putative enzyme                                                                     |
| CIBE_3636        | 6down | -2.1 | -1.4 | -0.4 | -0.7 | -       | putative galactoside ABC transporter                                                |
| CIBE_tRNA46      | 6down | -2.2 | -1.5 | -0.9 | 0.0  | -       | Ile tRNA                                                                            |
| CIBE_1055        | 6down | -1.6 | -1.3 | -0.9 | -1.3 | -       | DNA topoisomerase                                                                   |
| CIBE_0267        | 6down | -1.6 | -1.5 | -1.2 | -0.9 | glmS    | Glutamine-fructose-6-phosphate aminotransferase [isomerizing]                       |
| CIBE_1412        | 6down | -1.6 | -1.2 | -1.1 | -1.4 | ffh     | signal recognition particle-like (SRP) GTPase                                       |
| CIBE_4870        | 6down | -1.9 | -2.7 | -0.1 | -0.5 | -       | conserved protein of unknown function                                               |
| CIBE_5529        | 6down | -1.7 | -1.3 | -1.0 | -1.4 | -       | Glycosyl transferase                                                                |
| CIBE_5213        | 6down | -1.6 | -1.6 | -1.0 | -1.2 | -       | Sodium:dicarboxylate symporter                                                      |
| CIBE_5723        | 6down | -1.9 | -1.7 | -0.9 | -0.8 | -       | conserved exported protein of unknown function                                      |
| CIBE_5772        | 6down | -1.8 | -1.3 | -0.9 | -1.4 | -       | Methyl-accepting chemotaxis sensory transducer                                      |
| CIBE_2630        | 6down | -1.7 | -1.5 | -1.3 | -1.2 | -       | conserved exported protein of unknown function                                      |
| CIBE_0191        | 6down | -1.6 | -1.4 | -1.3 | -1.4 | mapA    | methionine aminopeptidase                                                           |
| CIBE_0637        | 6down | -1.8 | -1.6 | -1.1 | -1.4 | -       | 2-nitropropane dioxygenase, NPD                                                     |
| CIBE_5709        | 6down | -1.8 | -1.5 | -1.0 | -1.6 | artQ    | high affinity arginine ABC transporter (permease)                                   |
| CIBE_1369        | 6down | -1.7 | -1.7 | -1.3 | -1.3 | -       | Fe-S oxidoreductase                                                                 |
| CIBE_0805        | 6down | -2.0 | -1.6 | -1.2 | -1.1 | -       | conserved protein of unknown function                                               |
| CIBE_0418        | 6down | -2.0 | -1.3 | -1.0 | -1.7 | ytzG    | putative 16S pseudouridylate synthase                                               |
| CIBE_1014        | 6down | -1.7 | -1.7 | -1.3 | -1.3 | trmB    | tRNA (guanine-N(7))-methyltransferase                                               |

|                  |       |      |      |      |      |      |                                                                                      |
|------------------|-------|------|------|------|------|------|--------------------------------------------------------------------------------------|
| CIBE_1411        | 6down | -2.0 | -1.2 | -1.3 | -1.6 | ylxM | conserved hypothetical protein                                                       |
| CIBE_5007        | 6down | -1.7 | -1.2 | -1.0 | -2.3 | -    | conserved protein of unknown function                                                |
| CIBE_5698        | 6down | -2.2 | -1.4 | -1.3 | -1.2 | -    | Cation diffusion facilitator family transporter                                      |
| CIBE_5863        | 6down | -1.9 | -1.8 | -1.1 | -1.5 | murB | UDP-N-acetylenolpyruvoylglucosamine reductase                                        |
| CIBE_4421        | 6down | -2.3 | -1.7 | -1.7 | -0.7 | -    | transposase (fragment)                                                               |
| CIBE_1001        | 6down | -1.8 | -1.0 | -1.3 | -2.2 | rpsT | ribosomal protein S20 (BS20)                                                         |
| CIBE_0198        | 6down | -1.5 | -1.3 | -1.5 | -2.1 | rpoA | RNA polymerase (alpha subunit)                                                       |
| CIBE_0566        | 6down | -1.6 | -1.8 | -1.3 | -1.7 | -    | conserved membrane protein of unknown function                                       |
| CIBE_1624        | 6down | -1.7 | -1.5 | -1.5 | -1.8 | -    | conserved protein of unknown function                                                |
| CIBE_4992        | 6down | -1.5 | -1.6 | -1.6 | -1.8 | nupQ | permease of ABC guanosine transporter                                                |
| CIBE_2872        | 6down | -1.5 | -1.6 | -1.3 | -2.2 | -    | Ribose-phosphate pyrophosphokinase                                                   |
| CIBE_5607        | 6down | -1.8 | -1.3 | -1.5 | -2.1 | -    | Polysaccharide biosynthesis protein                                                  |
| CIBE_0050        | 6down | -1.7 | -1.4 | -1.6 | -2.0 | regA | HTH-type transcriptional regulator RegA                                              |
| CIBE_1414        | 6down | -1.6 | -1.5 | -1.6 | -2.0 | ylqC | putative RNA binding protein                                                         |
| CIBE_5948        | 6down | -1.8 | -1.9 | -1.4 | -1.6 | -    | putative transcriptional regulator, TetR family                                      |
| CIBE_2478        | 6down | -1.7 | -2.1 | -1.6 | -1.3 | -    | conserved protein of unknown function                                                |
| CIBE_4210        | 6down | -1.1 | -0.3 | -2.4 | -3.0 | -    | Extracellular solute-binding protein, family 1                                       |
| CIBE_5783        | 6down | -2.0 | -1.6 | -1.3 | -1.8 | -    | Dehydrogenase                                                                        |
| CIBE_2956        | 6down | -1.8 | -1.5 | -1.6 | -1.8 | -    | Polar amino acid ABC transporter, inner membrane subunit                             |
| CIBE_4864        | 6down | -2.5 | -1.7 | -1.3 | -1.3 | steT | Serine/threonine exchanger SteT                                                      |
| CIBE_1190        | 6down | -1.9 | -1.8 | -1.7 | -1.3 | -    | Tetradicopeptide TPR_2 repeat protein                                                |
| CIBE_6107        | 6down | -1.5 | -1.6 | -1.7 | -2.1 | rpsR | ribosomal protein S18                                                                |
| CIBE_6116        | 6down | -2.3 | -1.5 | -1.4 | -1.7 | -    | transposase (fragment)                                                               |
| CIBE_4945        | 6down | -2.7 | -1.9 | -1.1 | -1.1 | ycaM | putative transporter                                                                 |
| CIBE_4830        | 6down | -1.8 | -1.5 | -1.6 | -1.9 | -    | Signal peptidase I                                                                   |
| CIBE_3454        | 6down | -2.3 | -1.8 | -1.7 | -1.2 | -    | protein of unknown function                                                          |
| CIBE_1330        | 6down | -1.7 | -1.6 | -1.6 | -2.0 | rarA | DNA-dependent ATPase                                                                 |
| CIBE_1490        | 6down | -1.8 | -1.9 | -1.3 | -1.9 | kup  | putative potassium transport system protein kup                                      |
| CIBE_5914        | 6down | -1.8 | -1.3 | -2.0 | -1.9 | -    | Peptidase A8                                                                         |
| CIBE_5729        | 6down | -1.7 | -1.7 | -1.5 | -2.1 | -    | conserved protein of unknown function                                                |
| CIBE_5126        | 6down | -1.5 | -2.1 | -1.6 | -1.7 | -    | Flagellar hook capping protein (fragment)                                            |
| CIBE_0735        | 6down | -1.8 | -1.6 | -1.4 | -2.2 | -    | conserved protein of unknown function                                                |
| CIBE_1565        | 6down | -1.9 | -1.9 | -1.4 | -1.9 | iscS | Cysteine desulfurase                                                                 |
| CIBE_1427        | 6down | -1.7 | -1.4 | -1.5 | -2.4 | tsf  | elongation factor Ts                                                                 |
| CIBE_6030        | 6down | -1.5 | -1.6 | -1.6 | -2.3 | -    | DEAD/DEAH box helicase domain protein                                                |
| CIBE_3635        | 6down | -1.8 | -1.2 | -1.2 | -2.9 | -    | Rubrythrin                                                                           |
| CIBE_misc_RNA_46 | 6down | -3.1 | -2.4 | -0.9 | -0.7 | -    | Purine                                                                               |
| CIBE_0162        | 6down | -1.6 | -1.8 | -1.6 | -2.2 | rpsL | ribosomal protein S12 (BS12)                                                         |
| CIBE_2562        | 6down | -1.6 | -1.9 | -1.8 | -2.0 | aspS | Aspartate--tRNA ligase                                                               |
| CIBE_0197        | 6down | -1.8 | -1.6 | -1.7 | -2.2 | rpsD | 30S ribosomal subunit protein S4                                                     |
| CIBE_0679        | 6down | -1.8 | -1.6 | -1.8 | -2.2 | rplU | ribosomal protein L21 (BL20)                                                         |
| CIBE_5784        | 6down | -2.2 | -1.5 | -1.8 | -1.8 | -    | Xylose isomerase domain protein TIM barrel                                           |
| CIBE_4906        | 6down | -3.5 | -1.9 | -0.9 | -1.0 | -    | conserved membrane protein of unknown function                                       |
| CIBE_1623        | 6down | -1.9 | -1.7 | -1.8 | -2.0 | -    | conserved protein of unknown function                                                |
| CIBE_2076        | 6down | -1.8 | -1.8 | -1.6 | -2.2 | -    | Rrf2 family transcriptional regulator                                                |
| CIBE_misc_RNA_45 | 6down | -3.2 | -3.2 | -0.7 | -0.4 | -    | Purine                                                                               |
| CIBE_5855        | 6down | -1.7 | -2.0 | -1.5 | -2.3 | pyk  | pyruvate kinase                                                                      |
| CIBE_0903        | 6down | -2.1 | -2.4 | -1.3 | -1.7 | -    | FMN reductase                                                                        |
| CIBE_4960        | 6down | -1.8 | -2.1 | -1.7 | -1.9 | ydeP | Uncharacterized HTH-type transcriptional regulator YdeP                              |
| CIBE_1566        | 6down | -1.7 | -2.0 | -1.4 | -2.4 | trml | persulfide ATP pyrophosphatase involved in tRNA modification                         |
| CIBE_5118        | 6down | -1.6 | -2.0 | -2.0 | -2.0 | -    | Flagellar biosynthetic protein FlhB                                                  |
| CIBE_4098        | 6down | -1.6 | -1.8 | -2.5 | -1.7 | -    | conserved protein of unknown function                                                |
| CIBE_5130        | 6down | -1.8 | -2.2 | -1.4 | -2.2 | -    | Flagellar biosynthesis/type III secretory pathway-like protein                       |
| CIBE_0024        | 6down | -2.1 | -1.7 | -1.5 | -2.3 | -    | Haloacid dehalogenase                                                                |
| CIBE_0680        | 6down | -1.6 | -1.5 | -1.9 | -2.6 | -    | conserved protein of unknown function                                                |
| CIBE_0025        | 6down | -2.0 | -2.0 | -1.6 | -2.2 | ykpA | ABC efflux transporter (ATP-binding protein)                                         |
| CIBE_6056        | 6down | -2.5 | -1.8 | -1.7 | -1.8 | -    | RNA methyltransferase                                                                |
| CIBE_1403        | 6down | -1.6 | -1.9 | -1.9 | -2.5 | rpmF | ribosomal protein L32                                                                |
| CIBE_5945        | 6down | -1.7 | -2.2 | -1.6 | -2.4 | -    | Adenosylhomocysteine nucleosidase                                                    |
| CIBE_1265        | 6down | -1.8 | -2.0 | -2.0 | -2.2 | -    | conserved exported protein of unknown function                                       |
| CIBE_5131        | 6down | -2.0 | -2.3 | -1.7 | -2.0 | fliG | flagellar motor switching and energizing component                                   |
| CIBE_misc_RNA_43 | 6down | -3.5 | -2.6 | -1.1 | -0.7 | -    | Purine                                                                               |
| CIBE_2029        | 6down | -1.8 | -1.7 | -1.8 | -2.7 | nusB | N utilization substance protein B homolog                                            |
| CIBE_4120        | 6down | -2.3 | -2.5 | -1.5 | -1.7 | ydeD | putative permease                                                                    |
| CIBE_5135        | 6down | -1.9 | -2.2 | -1.6 | -2.3 | -    | Flagellar basal body rod protein FlgB                                                |
| CIBE_tRNA89      | 6down | -2.9 | -1.8 | -2.3 | -1.2 | -    | Asp tRNA                                                                             |
| CIBE_1068        | 6down | -2.7 | -2.0 | -3.0 | -0.4 | -    | conserved protein of unknown function                                                |
| CIBE_0298        | 6down | -2.2 | -2.0 | -2.1 | -1.9 | -    | conserved protein of unknown function                                                |
| CIBE_1418        | 6down | -1.9 | -2.0 | -1.9 | -2.4 | rbgA | ribosome biogenesis GTPase A                                                         |
| CIBE_0682        | 6down | -1.8 | -1.9 | -1.7 | -2.9 | obgE | ppGpp-binding GTPase involved in cell partitioning, DNA repair and ribosome assembly |
| CIBE_0158        | 6down | -1.9 | -1.8 | -1.9 | -2.6 | rplJ | ribosomal protein L10 (BL5)                                                          |
| CIBE_1419        | 6down | -2.2 | -1.7 | -1.9 | -2.5 | rnhB | ribonuclease HII                                                                     |
| CIBE_5117        | 6down | -1.6 | -2.3 | -2.0 | -2.4 | flhA | component of the flagellar export machinery                                          |
| CIBE_5334        | 6down | -3.0 | -2.6 | -2.1 | -0.7 | rbsA | ribose ABC transporter (ATP-binding protein)                                         |
| CIBE_5122        | 6down | -1.6 | -2.1 | -1.8 | -2.9 | -    | Flagellar basal body-associated protein FlilL                                        |
| CIBE_5132        | 6down | -2.1 | -2.4 | -1.9 | -2.0 | -    | Flagellar M-ring protein                                                             |
| CIBE_2477        | 6down | -2.1 | -2.1 | -1.9 | -2.4 | -    | Zinc chelation protein SecC                                                          |
| CIBE_4853        | 6down | -2.0 | -2.1 | -2.1 | -2.3 | -    | Methyl-accepting chemotaxis protein                                                  |
| CIBE_5144        | 6down | -1.6 | -2.1 | -1.8 | -3.1 | rmIC | dTDP-4-deoxyrhamnose-3,5-epimerase                                                   |
| CIBE_5944        | 6down | -1.8 | -2.2 | -2.1 | -2.5 | tcdA | tRNA threonylcarbamoyladenine dehydratase                                            |
| CIBE_2073        | 6down | -2.1 | -2.8 | -1.5 | -2.3 | -    | conserved membrane protein of unknown function                                       |
| CIBE_0074        | 6down | -1.8 | -2.1 | -2.0 | -2.7 | -    | Anaerobic ribonucleoside-triphosphate reductase                                      |
| CIBE_2295        | 6down | -3.3 | -2.5 | -1.2 | -1.6 | yjeM | putative transporter                                                                 |
| CIBE_2930        | 6down | -2.4 | -2.1 | -1.9 | -2.3 | -    | Zinc chelation protein SecC                                                          |
| CIBE_4105        | 6down | -1.9 | -2.1 | -3.0 | -1.7 | -    | Phage-like element pbsx protein XkdK                                                 |
| CIBE_4283        | 6down | -2.9 | -3.0 | -2.6 | -0.2 | -    | conserved protein of unknown function                                                |
| CIBE_1059        | 6down | -1.8 | -2.4 | -1.8 | -2.8 | -    | Methyl-accepting chemotaxis protein                                                  |
| CIBE_3993        | 6down | -1.9 | -2.3 | -2.1 | -2.6 | -    | Chemotaxis protein                                                                   |
| CIBE_4060        | 6down | -2.4 | -2.3 | -2.0 | -2.1 | -    | Sigma54 specific transcriptional regulator, Fis family                               |
| CIBE_2075        | 6down | -3.0 | -2.4 | -1.5 | -2.0 | -    | RNA helicase                                                                         |
| CIBE_4104        | 6down | -1.8 | -2.1 | -3.1 | -1.9 | -    | Phage-like element pbsx protein XkdM                                                 |

|                  |        |      |      |      |      |      |                                                                                           |
|------------------|--------|------|------|------|------|------|-------------------------------------------------------------------------------------------|
| CIBE_5324        | 6down  | -2.0 | -2.2 | -2.7 | -2.0 | -    | Radical SAM domain protein                                                                |
| CIBE_0642        | 6down  | -1.8 | -2.1 | -2.4 | -2.6 | -    | Metallophosphoesterase                                                                    |
| CIBE_1639        | 6down  | -2.5 | -1.7 | -1.9 | -2.9 | -    | conserved protein of unknown function                                                     |
| CIBE_5123        | 6down  | -1.6 | -2.1 | -2.0 | -3.2 | ylzI | putative flagellar protein                                                                |
| CIBE_0159        | 6down  | -1.8 | -2.0 | -2.1 | -3.1 | rplL | ribosomal protein L12 (BL9)                                                               |
| CIBE_2115        | 6down  | -3.0 | -2.5 | -2.5 | -0.9 | -    | protein of unknown function                                                               |
| CIBE_misc_RNA_56 | 6down  | -2.3 | -2.1 | -1.8 | -2.8 | -    | L10_leader                                                                                |
| CIBE_0893        | 6down  | -0.4 | -2.2 | -2.7 | -3.9 | dhaS | 3-hydroxypropionaldehyde dehydrogenase                                                    |
| CIBE_1621        | 6down  | -2.3 | -2.3 | -1.7 | -2.7 | -    | Metal-dependent hydrolase of the beta-lactamase superfamily                               |
| CIBE_5032        | 6down  | -2.2 | -2.5 | -2.0 | -2.4 | -    | conserved membrane protein of unknown function                                            |
| CIBE_4234        | 6down  | -2.2 | -2.2 | -2.8 | -1.9 | -    | FMN-binding protein                                                                       |
| CIBE_1172        | 6down  | -2.6 | -2.1 | -1.9 | -2.5 | -    | Major facilitator superfamily MFS_1                                                       |
| CIBE_5143        | 6down  | -2.2 | -2.5 | -2.1 | -2.4 | -    | Glycosyltransferase, group 2 family protein                                               |
| CIBE_tRNA88      | 6down  | -3.3 | -2.2 | -2.5 | -1.2 | -    | Phe tRNA                                                                                  |
| CIBE_2192        | 6down  | -0.6 | -2.4 | -2.9 | -3.3 | sufB | FeS cluster formation protein                                                             |
| CIBE_0365        | 6down  | -2.2 | -2.3 | -2.1 | -2.6 | -    | protein of unknown function                                                               |
| CIBE_5154        | 6down  | -2.0 | -2.3 | -2.0 | -2.9 | -    | Group 2 glycosyl transferase                                                              |
| CIBE_tRNA47      | 6down  | -1.9 | -1.9 | -1.8 | -3.6 | -    | Asn tRNA                                                                                  |
| CIBE_1417        | 6down  | -2.1 | -2.1 | -2.2 | -2.9 | rplS | ribosomal protein L19                                                                     |
| CIBE_3861        | 6down  | -1.7 | -1.8 | -2.2 | -3.6 | gltT | proton/sodium-glutamate symport protein                                                   |
| CIBE_5137        | 6down  | -1.9 | -2.4 | -1.5 | -3.5 | -    | MotA/TolQ/ExbB proton channel                                                             |
| CIBE_0955        | 6down  | -1.5 | -2.4 | -2.3 | -3.2 | -    | Thioredoxin reductase                                                                     |
| CIBE_4548        | 6down  | -2.7 | -2.4 | -2.2 | -2.1 | yial | putative hydrogenase, 4Fe-4S ferredoxin-type component                                    |
| CIBE_1212        | 6down  | -1.8 | -2.7 | -1.9 | -3.0 | -    | conserved protein of unknown function                                                     |
| CIBE_0681        | 6down  | -2.1 | -2.0 | -2.3 | -3.0 | rpmA | ribosomal protein L27 (BL24)                                                              |
| CIBE_1127        | 6down  | -2.3 | -2.5 | -2.5 | -2.1 | -    | Membrane protein                                                                          |
| CIBE_0552        | 6down  | -2.4 | -2.2 | -2.1 | -2.8 | pyrG | CTP synthetase                                                                            |
| CIBE_2480        | 6down  | -2.6 | -2.2 | -2.3 | -2.4 | amtB | ammonium transporter                                                                      |
| CIBE_5895        | 6down  | -2.1 | -2.1 | -2.3 | -3.0 | -    | HAD family hydrolase                                                                      |
| CIBE_0522        | 6down  | -1.9 | -2.3 | -2.5 | -2.9 | -    | Sulfatase                                                                                 |
| CIBE_0832        | 6down  | -2.8 | -2.6 | -1.9 | -2.3 | -    | Membrane protein                                                                          |
| CIBE_0954        | 6down  | -2.0 | -2.3 | -2.5 | -2.9 | bsaA | putative bacillithiol peroxidase                                                          |
| CIBE_1130        | 6down  | -2.0 | -2.3 | -2.1 | -3.2 | -    | Flavin reductase domain protein, FMN-binding                                              |
| CIBE_4027        | 6down  | -2.3 | -2.7 | -2.3 | -2.4 | -    | conserved exported protein of unknown function                                            |
| CIBE_2191        | 6down  | -0.7 | -2.6 | -3.1 | -3.4 | sufC | sulfur mobilizing ABC protein, ATPase                                                     |
| CIBE_1211        | 6down  | -2.3 | -2.9 | -2.2 | -2.6 | -    | conserved exported protein of unknown function                                            |
| CIBE_3033        | 6down  | -2.1 | -1.9 | -2.2 | -3.7 | -    | Cof-like hydrolase                                                                        |
| CIBE_3372        | 6down  | -2.1 | -3.1 | -2.7 | -2.1 | -    | SCP-like extracellular protein                                                            |
| CIBE_5104        | 6down  | -2.3 | -2.5 | -2.0 | -3.3 | -    | Haloacid dehalogenase                                                                     |
| CIBE_0081        | 6down  | -2.9 | -2.9 | -2.1 | -2.3 | -    | HD family phosphohydrolase                                                                |
| CIBE_1090        | 6down  | -1.9 | -2.7 | -2.7 | -2.9 | -    | Ig-like domain-containing protein, putative cell wall binding protein (fragment)          |
| CIBE_5342        | 6down  | -1.7 | -2.6 | -2.5 | -3.4 | -    | conserved protein of unknown function                                                     |
| CIBE_5325        | 6down  | -1.9 | -2.3 | -3.3 | -2.7 | -    | conserved protein of unknown function                                                     |
| CIBE_5134        | 6down  | -2.3 | -2.8 | -2.0 | -3.1 | flgC | flagellar component of cell-proximal portion of basal-body rod                            |
| CIBE_0141        | 6down  | -2.0 | -2.1 | -2.9 | -3.3 | -    | Uncharacterized glutaredoxin-like 8.6 kDa protein in rubredoxin operon                    |
| CIBE_1803        | 6down  | -2.6 | -2.7 | -2.3 | -2.8 | yfmM | putative ATP-binding protein                                                              |
| CIBE_0288        | 6down  | -2.4 | -2.6 | -2.3 | -3.1 | -    | Methyl-accepting chemotaxis sensory transducer                                            |
| CIBE_4949        | 6down  | -2.3 | -2.6 | -2.5 | -2.9 | -    | Secretion protein HlyD family protein                                                     |
| CIBE_0541        | 6down  | -1.8 | -2.2 | -3.4 | -3.0 | -    | protein of unknown function                                                               |
| CIBE_5155        | 6down  | -2.3 | -2.8 | -1.9 | -3.4 | -    | conserved protein of unknown function                                                     |
| CIBE_5138        | 6down  | -2.1 | -2.7 | -2.2 | -3.5 | -    | Flagellin                                                                                 |
| CIBE_4324        | 6down  | -2.3 | -2.0 | -2.7 | -3.7 | -    | Methyl-accepting chemotaxis protein                                                       |
| CIBE_tRNA19      | 6down  | -3.1 | -2.7 | -2.2 | -2.7 | -    | Asn tRNA                                                                                  |
| CIBE_5156        | 6down  | -2.3 | -2.5 | -2.2 | -3.8 | -    | Glycosyltransferase                                                                       |
| CIBE_5136        | 6down  | -2.8 | -2.6 | -1.4 | -3.9 | -    | OmpA/MotB domain protein                                                                  |
| CIBE_5091        | 6down  | -2.9 | -2.6 | -2.0 | -3.3 | hpt  | Hypoxanthine phosphoribosyltransferase                                                    |
| CIBE_5694        | 6down  | -2.5 | -2.6 | -3.7 | -2.0 | -    | exported protein of unknown function                                                      |
| CIBE_5133        | 6down  | -2.2 | -2.4 | -2.0 | -4.0 | fliE | Flagellar hook-basal body complex protein FliE                                            |
| CIBE_5946        | 6down  | -2.2 | -2.8 | -2.5 | -3.4 | -    | Methyl-accepting chemotaxis sensory transducer                                            |
| CIBE_5061        | 6down  | -2.4 | -2.3 | -2.9 | -3.2 | -    | putative Methyl-accepting chemotaxis protein                                              |
| CIBE_0351        | 6down  | -3.2 | -3.6 | -2.0 | -2.2 | guaA | GMP synthetase                                                                            |
| CIBE_0539        | 6down  | -1.6 | -2.5 | -3.1 | -3.8 | gpo  | Glutathione peroxidase                                                                    |
| CIBE_5693        | 6down  | -2.3 | -2.8 | -2.8 | -3.1 | -    | S-layer domain-containing protein (fragment)                                              |
| CIBE_4777        | 6down  | -2.4 | -2.8 | -2.6 | -3.2 | -    | Methyl-accepting chemotaxis protein                                                       |
| CIBE_4855        | 6down  | -2.3 | -2.3 | -3.2 | -3.3 | -    | Chemotaxis protein CheA                                                                   |
| CIBE_3862        | 6down  | -1.7 | -2.4 | -3.5 | -3.6 | ansB | L-aspartase (aspartate ammonia lyase)                                                     |
| CIBE_1125        | 6down  | -2.2 | -3.1 | -2.5 | -3.5 | -    | Murein hydrolase transporter LrgA                                                         |
| CIBE_4550        | 6down  | -2.8 | -3.1 | -2.9 | -2.5 | -    | Molybdopterin-guanine dinucleotide biosynthesis protein B                                 |
| CIBE_5335        | 6down  | -2.6 | -2.2 | -3.6 | -2.8 | mgIB | methyl-galactoside transporter subunit ; periplasmic-binding component of ABC superfamily |
| CIBE_4284        | 6down  | -2.4 | -3.1 | -3.8 | -2.0 | -    | ApbE family lipoprotein                                                                   |
| CIBE_1062        | 6down  | -2.8 | -2.8 | -2.4 | -3.5 | -    | Methyl-accepting chemotaxis protein                                                       |
| CIBE_2186        | 6down  | -3.2 | -3.3 | -2.4 | -2.7 | fruK | fructose-1-phosphate kinase                                                               |
| CIBE_3458        | 6down  | -3.4 | -2.7 | -3.0 | -2.5 | -    | Methyl-accepting chemotaxis protein                                                       |
| CIBE_4553        | 6down  | -3.0 | -3.2 | -3.0 | -2.5 | -    | conserved protein of unknown function                                                     |
| CIBE_1126        | 6down  | -2.2 | -3.7 | -2.6 | -3.3 | -    | protein of unknown function                                                               |
| CIBE_2185        | 6down  | -2.8 | -3.3 | -2.5 | -3.3 | fruR | transcriptional regulator (DeoR family)                                                   |
| CIBE_4551        | 6down  | -3.3 | -3.4 | -2.6 | -2.6 | -    | Molybdenum cofactor biosynthesis protein                                                  |
| CIBE_2187        | 6down  | -3.0 | -3.5 | -2.6 | -2.9 | fruA | phosphotransferase system (PTS) fructose-specific enzyme IIABC component                  |
| CIBE_3631        | 6down  | -1.6 | -2.6 | -3.1 | -4.6 | -    | Cation transporter                                                                        |
| CIBE_5785        | 6down  | -2.0 | -3.0 | -3.2 | -3.8 | -    | Oxidoreductase                                                                            |
| CIBE_4844        | 6down  | -3.2 | -3.0 | -2.7 | -3.3 | maeB | NADP-dependent malic enzyme (conversion of malate into pyruvate)                          |
| CIBE_4856        | 6down  | -2.8 | -3.1 | -3.4 | -3.4 | cheY | regulator of chemotaxis and motility                                                      |
| CIBE_0214        | 6down  | -2.6 | -2.6 | -3.0 | -4.6 | nrdB | Ribonucleoside-diphosphate reductase subunit beta                                         |
| CIBE_4282        | 6down  | -2.0 | -3.7 | -3.4 | -4.0 | -    | FMN-binding domain protein                                                                |
| CIBE_0213        | 6down  | -2.5 | -3.3 | -3.0 | -4.5 | -    | protein of unknown function                                                               |
| CIBE_3630        | 6down  | -2.7 | -3.4 | -3.5 | -3.9 | csoR | repressor of copper utilisation proteins - Cu(I)                                          |
| CIBE_1061        | 6down  | -3.0 | -3.4 | -2.6 | -4.5 | -    | Transferase                                                                               |
| CIBE_0212        | 6down  | -3.0 | -3.2 | -3.5 | -4.6 | nrdA | Ribonucleoside-diphosphate reductase subunit alpha                                        |
| CIBE_2867        | 6down- | -3.8 | -4.0 | -1.9 | -2.2 | -    | conserved membrane protein of unknown function                                            |
| CIBE_4061        | 6down- | -4.1 | -3.5 | -2.9 | -2.1 | -    | Glycoside hydrolase, family 18                                                            |
| CIBE_4547        | 6down- | -2.3 | -4.2 | -3.2 | -3.4 | hndD | NADP-reducing hydrogenase subunit HndC                                                    |



|           |        |      |      |      |      |       |                                                                                                                 |
|-----------|--------|------|------|------|------|-------|-----------------------------------------------------------------------------------------------------------------|
| CIBE_4549 | 6down- | -2.8 | -4.5 | -3.0 | -2.8 | fdhD  | Protein FdhD homolog                                                                                            |
| CIBE_2868 | 6down- | -4.1 | -4.5 | -2.0 | -2.7 | xpt   | xanthine phosphoribosyltransferase                                                                              |
| CIBE_4976 | 6down- | -2.4 | -4.4 | -3.3 | -5.1 | -     | Methyl-accepting chemotaxis sensory transducer                                                                  |
| CIBE_4552 | 6down- | -3.5 | -3.6 | -3.9 | -4.5 | fdhF  | Formate dehydrogenase H                                                                                         |
| CIBE_4062 | 6down- | -3.1 | -3.6 | -4.3 | -4.8 | ytbE  | promiscuous aldo/keto reductase                                                                                 |
| CIBE_0397 | 6down- | -3.4 | -4.1 | -3.9 | -4.5 | -     | Bacterial surface protein                                                                                       |
| CIBE_1759 | 6down- | -3.5 | -3.5 | -4.5 | -5.0 | glT   | proton/sodium-glutamate symport protein                                                                         |
| CIBE_1119 | 6down- | -3.8 | -3.6 | -4.2 | -5.0 | -     | conserved membrane protein of unknown function                                                                  |
| CIBE_4063 | 6down- | -3.1 | -4.0 | -4.6 | -5.4 | -     | FMN reductase                                                                                                   |
| CIBE_1120 | 6down- | -4.8 | -3.8 | -4.5 | -6.4 | -     | conserved membrane protein of unknown function                                                                  |
| CIBE_3701 | 8up+   | 1.1  | 3.7  | 4.0  | 3.9  | -     | conserved protein of unknown function                                                                           |
| CIBE_5020 | 8up+   | 0.3  | 5.1  | 3.9  | 3.1  | bceA  | bacitracin ABC efflux transporter (ATP-binding protein)                                                         |
| CIBE_1732 | 8up+   | 0.4  | 2.8  | 4.6  | 3.9  | yraG  | putative spore coat protein                                                                                     |
| CIBE_4645 | 8up+   | 0.5  | 4.7  | 3.2  | 3.1  | -     | Erythromycin esterase                                                                                           |
| CIBE_3257 | 8up+   | -0.3 | 2.8  | 4.6  | 3.8  | -     | PTS beta-glucoside transporter subunit IIBC                                                                     |
| CIBE_4643 | 8up+   | 0.3  | 3.9  | 2.6  | 2.8  | yxgL  | ABC transporter (ATP-binding protein); efflux of cationic peptides                                              |
| CIBE_5019 | 8up+   | -0.2 | 4.4  | 2.8  | 2.6  | -     | conserved membrane protein of unknown function                                                                  |
| CIBE_0318 | 8up    | 0.5  | 3.1  | 4.1  | 4.5  | -     | ABC transporter, ATP-binding protein                                                                            |
| CIBE_2546 | 8up    | 0.3  | 2.4  | 2.8  | 6.4  | -     | protein of unknown function                                                                                     |
| CIBE_0317 | 8up    | 0.4  | 3.1  | 3.9  | 4.5  | -     | ABC transporter, permease protein                                                                               |
| CIBE_5103 | 8up    | 0.6  | 3.1  | 3.8  | 4.2  | -     | Membrane protein                                                                                                |
| CIBE_3697 | 8up    | 0.1  | 2.4  | 2.1  | 6.9  | -     | conserved protein of unknown function                                                                           |
| CIBE_5102 | 8up    | 0.8  | 2.8  | 3.6  | 4.0  | -     | Diguanylate cyclase                                                                                             |
| CIBE_1783 | 8up    | -0.1 | 1.5  | 4.6  | 5.1  | -     | conserved protein of unknown function                                                                           |
| CIBE_2954 | 8up    | 0.5  | 2.4  | 3.7  | 3.9  | -     | conserved protein of unknown function                                                                           |
| CIBE_4796 | 8up    | -0.4 | 2.9  | 4.4  | 3.6  | -     | conserved protein of unknown function                                                                           |
| CIBE_3575 | 8up    | -0.3 | 2.8  | 4.4  | 3.5  | cooS  | Carbon monoxide dehydrogenase                                                                                   |
| CIBE_4568 | 8up    | 0.7  | 2.9  | 3.5  | 3.3  | yycR  | putative ABC transporter (ATP-binding protein)                                                                  |
| CIBE_0820 | 8up    | 0.1  | 2.2  | 4.2  | 3.6  | -     | Polysaccharide deacetylase                                                                                      |
| CIBE_5655 | 8up    | 0.3  | 2.8  | 3.6  | 3.5  | -     | Tyrosine protein kinase                                                                                         |
| CIBE_2308 | 8up    | 0.2  | 2.5  | 3.9  | 3.4  | -     | LemA family protein                                                                                             |
| CIBE_1684 | 8up    | -0.5 | 2.1  | 4.2  | 3.8  | nifJ  | Pyruvate-flavodoxin oxidoreductase                                                                              |
| CIBE_3300 | 8up    | 0.6  | 2.8  | 3.6  | 2.5  | cspC  | cold-shock protein                                                                                              |
| CIBE_1784 | 8up    | -0.5 | 1.2  | 4.0  | 4.7  | rpsD  | 30S ribosomal protein S4 B                                                                                      |
| CIBE_3596 | 8up    | 0.2  | 2.4  | 3.9  | 2.9  | -     | Alkyl hydroperoxide reductase/ Thiol specific antioxidant/ Mal allergen                                         |
| CIBE_1336 | 8up    | 1.2  | 3.0  | 2.8  | 2.3  | -     | PRC-barrel domain protein                                                                                       |
| CIBE_1733 | 8up    | 0.0  | 2.2  | 3.8  | 3.2  | yraF  | putative spore coat protein                                                                                     |
| CIBE_5645 | 8up    | 0.3  | 2.9  | 3.1  | 3.0  | -     | Glycosyl transferase, group 1                                                                                   |
| CIBE_3725 | 8up    | 0.2  | 2.4  | 3.4  | 3.3  | -     | D-galactose-binding periplasmic protein                                                                         |
| CIBE_5519 | 8up    | -0.3 | 2.4  | 4.2  | 2.9  | -     | conserved protein of unknown function                                                                           |
| CIBE_3507 | 8up    | 0.7  | 2.2  | 3.4  | 2.9  | -     | conserved protein of unknown function                                                                           |
| CIBE_3163 | 8up    | 0.4  | 2.0  | 3.4  | 3.4  | celB  | Cellobiose permease IIC component                                                                               |
| CIBE_0545 | 8up    | 0.4  | 2.6  | 3.2  | 3.0  | -     | Cyanophycinase                                                                                                  |
| CIBE_2771 | 8up    | 1.3  | 2.8  | 2.9  | 2.1  | -     | conserved protein of unknown function                                                                           |
| CIBE_2045 | 8up    | -0.1 | 2.9  | 3.4  | 2.7  | -     | conserved protein of unknown function                                                                           |
| CIBE_3260 | 8up    | -1.2 | 2.3  | 4.1  | 3.6  | -     | Transaldolase                                                                                                   |
| CIBE_5520 | 8up    | -0.5 | 2.1  | 4.3  | 3.0  | -     | Coat F domain protein                                                                                           |
| CIBE_1086 | 8up    | -0.3 | 3.0  | 3.2  | 2.8  | -     | conserved exported protein of unknown function                                                                  |
| CIBE_5517 | 8up    | -0.6 | 2.5  | 4.2  | 2.6  | -     | conserved protein of unknown function                                                                           |
| CIBE_5328 | 8up    | 0.0  | 2.0  | 3.0  | 3.6  | -     | putative galactoside ABC transporter                                                                            |
| CIBE_3572 | 8up    | 0.0  | 2.1  | 3.5  | 3.0  | norV  | flavorubredoxin oxidoreductase                                                                                  |
| CIBE_0127 | 8up    | 0.9  | 2.6  | 2.8  | 2.2  | -     | Amidohydrolase                                                                                                  |
| CIBE_0098 | 8up    | -0.2 | 2.9  | 3.5  | 2.4  | spoVT | transcriptional regulator                                                                                       |
| CIBE_2663 | 8up    | -0.8 | 2.6  | 3.6  | 3.1  | -     | Amidohydrolase                                                                                                  |
| CIBE_0544 | 8up    | 0.1  | 2.8  | 2.8  | 2.5  | -     | conserved protein of unknown function                                                                           |
| CIBE_3528 | 8up    | 0.1  | 2.5  | 3.5  | 2.2  | -     | Coat F domain protein                                                                                           |
| CIBE_3577 | 8up    | -0.2 | 1.4  | 3.6  | 3.5  | -     | Cupin 2 conserved barrel protein                                                                                |
| CIBE_0546 | 8up    | 0.2  | 2.2  | 3.1  | 2.9  | -     | Cyanophycin synthetase                                                                                          |
| CIBE_5454 | 8up    | 0.6  | 2.1  | 3.2  | 2.3  | yngF  | putative Methylglutaconyl-CoA hydratase                                                                         |
| CIBE_2057 | 8up    | 0.0  | 1.9  | 3.0  | 3.3  | -     | Glycosyl transferase                                                                                            |
| CIBE_3642 | 8up    | 0.6  | 2.5  | 2.4  | 2.7  | -     | D-galactose-binding periplasmic protein                                                                         |
| CIBE_3958 | 8up    | 0.6  | 2.5  | 3.1  | 2.0  | -     | conserved protein of unknown function                                                                           |
| CIBE_5420 | 8up    | -1.2 | 2.2  | 3.6  | 3.6  | -     | conserved protein of unknown function                                                                           |
| CIBE_4858 | 8up    | 0.3  | 2.1  | 3.1  | 2.7  | bgIB  | Thermostable beta-glucosidase B                                                                                 |
| CIBE_2362 | 8up    | -0.3 | 2.0  | 3.3  | 3.1  | yhcV  | CBS domain-containing protein YhcV                                                                              |
| CIBE_1750 | 8up    | 0.4  | 1.5  | 3.3  | 2.8  | -     | conserved protein of unknown function                                                                           |
| CIBE_2002 | 8up    | 0.6  | 2.2  | 2.9  | 2.2  | -     | conserved protein of unknown function                                                                           |
| CIBE_4218 | 8up    | 0.8  | 2.4  | 2.7  | 2.1  | acdA  | acyl-CoA dehydrogenase                                                                                          |
| CIBE_4985 | 8up    | -0.2 | 2.8  | 3.2  | 2.2  | -     | conserved exported protein of unknown function                                                                  |
| CIBE_4745 | 8up    | -0.6 | 2.0  | 3.2  | 3.4  | -     | putative galactoside ABC transporter                                                                            |
| CIBE_1188 | 8up    | -0.7 | 1.2  | 3.8  | 3.7  | -     | Delta-lactam-biosynthetic de-N-acetylase                                                                        |
| CIBE_5101 | 8up    | -0.3 | 2.3  | 3.2  | 2.7  | -     | conserved protein of unknown function                                                                           |
| CIBE_4567 | 8up    | 0.4  | 2.1  | 2.5  | 2.8  | -     | conserved membrane protein of unknown function                                                                  |
| CIBE_0757 | 8up    | 0.6  | 2.2  | 3.0  | 2.1  | -     | conserved protein of unknown function                                                                           |
| CIBE_1745 | 8up    | -0.9 | 1.5  | 4.1  | 3.1  | -     | conserved protein of unknown function                                                                           |
| CIBE_1226 | 8up    | 0.4  | 2.1  | 2.8  | 2.4  | -     | conserved protein of unknown function                                                                           |
| CIBE_0065 | 8up    | 0.4  | 2.3  | 2.7  | 2.3  | -     | conserved exported protein of unknown function                                                                  |
| CIBE_1734 | 8up    | -0.3 | 1.5  | 3.4  | 2.9  | adhB  | putative oxidoreductase                                                                                         |
| CIBE_3627 | 8up    | -0.2 | 1.9  | 3.2  | 2.7  | -     | FAD-dependent oxidoreductase                                                                                    |
| CIBE_1669 | 8up    | -0.3 | 2.1  | 3.1  | 2.6  | amyC  | putative starch degradation products transport system permease protein AmyC                                     |
| CIBE_5518 | 8up    | -0.6 | 1.9  | 3.7  | 2.5  | -     | Coat F domain protein                                                                                           |
| CIBE_3927 | 8up    | -0.1 | 2.6  | 2.2  | 2.8  | -     | conserved protein of unknown function                                                                           |
| CIBE_0306 | 8up    | -0.7 | 1.9  | 3.6  | 2.6  | adhE  | fused acetaldehyde-CoA dehydrogenase ; iron-dependent alcohol dehydrogenase ; pyruvate-formate lyase deactivase |
| CIBE_1229 | 8up    | -0.8 | 2.3  | 3.1  | 2.8  | -     | Stage V sporulation protein AF                                                                                  |
| CIBE_4835 | 8up    | 0.2  | 1.7  | 3.0  | 2.5  | -     | Ferredoxin hydrogenase                                                                                          |
| CIBE_2743 | 8up    | -0.4 | 2.3  | 3.2  | 2.2  | -     | conserved protein of unknown function                                                                           |
| CIBE_1494 | 8up    | -0.2 | 1.3  | 3.2  | 2.9  | -     | Protein CA_C1420                                                                                                |
| CIBE_5646 | 8up    | 0.3  | 2.3  | 2.7  | 1.9  | -     | conserved membrane protein of unknown function                                                                  |
| CIBE_2218 | 8up    | -0.9 | 1.6  | 3.6  | 3.0  | dacF  | D-alanyl-D-alanine carboxypeptidase DacF                                                                        |
| CIBE_2307 | 8up    | -0.5 | 1.5  | 3.1  | 3.1  | -     | conserved exported protein of unknown function                                                                  |
| CIBE_5419 | 8up    | -1.0 | 1.7  | 2.9  | 3.6  | -     | conserved protein of unknown function                                                                           |

|           |     |      |     |     |     |                                                                             |
|-----------|-----|------|-----|-----|-----|-----------------------------------------------------------------------------|
| CIBE_2131 | 8up | 0.4  | 2.0 | 2.6 | 2.2 | Deacetylase                                                                 |
| CIBE_2056 | 8up | -0.2 | 1.9 | 3.2 | 2.2 | conserved protein of unknown function                                       |
| CIBE_3019 | 8up | -0.9 | 2.2 | 3.6 | 2.2 | conserved protein of unknown function                                       |
| CIBE_3504 | 8up | -1.1 | 0.8 | 3.4 | 4.0 | conserved exported protein of unknown function                              |
| CIBE_1735 | 8up | -0.1 | 1.9 | 2.8 | 2.5 | Spore coat protein                                                          |
| CIBE_2566 | 8up | 0.3  | 2.0 | 2.8 | 2.0 | conserved protein of unknown function                                       |
| CIBE_1545 | 8up | 0.3  | 1.8 | 2.8 | 2.2 | conserved protein of unknown function                                       |
| CIBE_1683 | 8up | 0.2  | 2.2 | 2.7 | 2.0 | conserved protein of unknown function                                       |
| CIBE_3923 | 8up | 0.1  | 1.6 | 2.7 | 2.6 | Spore cortex-lytic protein                                                  |
| CIBE_1309 | 8up | -0.8 | 2.4 | 2.4 | 2.9 | protein of unknown function                                                 |
| CIBE_5365 | 8up | -0.9 | 0.8 | 3.2 | 3.7 | Methyl-accepting chemotaxis sensory transducer                              |
| CIBE_5656 | 8up | -1.3 | 2.5 | 3.0 | 2.6 | Lipopolysaccharide biosynthesis protein                                     |
| CIBE_5686 | 8up | -0.6 | 1.1 | 3.1 | 3.2 | conserved protein of unknown function                                       |
| CIBE_2493 | 8up | -0.3 | 1.8 | 2.7 | 2.5 | Extracellular solute-binding protein, family 3                              |
| CIBE_5100 | 8up | -0.6 | 1.9 | 2.6 | 2.8 | putative glycosyltransferase associated to biofilm formation                |
| CIBE_4957 | 8up | 0.0  | 1.9 | 2.4 | 2.3 | conserved protein of unknown function                                       |
| CIBE_0510 | 8up | -0.9 | 1.9 | 3.0 | 2.7 | Endothelin-converting enzyme 1                                              |
| CIBE_3002 | 8up | -1.1 | 1.5 | 3.5 | 2.8 | conserved protein of unknown function                                       |
| CIBE_3935 | 8up | -0.3 | 1.3 | 2.9 | 2.7 | Small, acid-soluble spore protein beta                                      |
| CIBE_1670 | 8up | -0.2 | 1.6 | 2.8 | 2.4 | Alpha-glucosidase 2                                                         |
| CIBE_3149 | 8up | -0.1 | 1.4 | 2.8 | 2.4 | putative acylolate-acetoacetate CoA-transferase                             |
| CIBE_1312 | 8up | -0.4 | 0.8 | 2.8 | 3.2 | Autolysin (fragment)                                                        |
| CIBE_4642 | 8up | 0.0  | 3.3 | 1.4 | 1.7 | conserved membrane protein of unknown function                              |
| CIBE_5644 | 8up | 0.0  | 2.1 | 2.3 | 1.9 | Glycosyl transferase, family 2                                              |
| CIBE_3150 | 8up | -0.2 | 1.4 | 2.8 | 2.4 | acetoacetyl CoA-transferase (subunit A)                                     |
| CIBE_4958 | 8up | -0.2 | 1.7 | 2.7 | 2.2 | conserved protein of unknown function                                       |
| CIBE_0741 | 8up | 0.2  | 1.8 | 2.3 | 2.1 | conserved protein of unknown function                                       |
| CIBE_2744 | 8up | -1.0 | 2.2 | 2.9 | 2.2 | protein of unknown function                                                 |
| CIBE_1671 | 8up | 0.1  | 1.6 | 2.7 | 2.0 | Oligo-1,6-glucosidase                                                       |
| CIBE_2745 | 8up | -0.7 | 2.2 | 3.1 | 1.7 | Reverse rubrerythrin-1                                                      |
| CIBE_0064 | 8up | 0.1  | 1.8 | 2.6 | 1.8 | conserved protein of unknown function                                       |
| CIBE_6033 | 8up | -1.1 | 1.6 | 3.1 | 2.5 | Phosphohydrolase                                                            |
| CIBE_2316 | 8up | 0.0  | 2.0 | 2.2 | 1.8 | Card family transcriptional regulator                                       |
| CIBE_4956 | 8up | 0.1  | 1.7 | 2.3 | 2.0 | Amine oxidase                                                               |
| CIBE_1748 | 8up | -0.8 | 1.7 | 3.4 | 1.7 | conserved exported protein of unknown function                              |
| CIBE_4402 | 8up | -0.8 | 1.7 | 2.6 | 2.5 | Dual specificity protein phosphatase                                        |
| CIBE_5066 | 8up | 0.2  | 2.2 | 2.4 | 1.3 | protein of unknown function                                                 |
| CIBE_3516 | 8up | 0.1  | 1.6 | 2.4 | 1.9 | conserved protein of unknown function                                       |
| CIBE_5436 | 8up | -0.8 | 1.6 | 2.7 | 2.3 | Amino acid permease-associated region                                       |
| CIBE_3517 | 8up | -0.1 | 1.6 | 2.6 | 1.8 | Rubrerythrin                                                                |
| CIBE_2560 | 8up | -0.5 | 1.1 | 2.9 | 2.4 | conserved exported protein of unknown function                              |
| CIBE_2662 | 8up | -0.1 | 2.7 | 2.1 | 1.0 | protein of unknown function                                                 |
| CIBE_1668 | 8up | -0.6 | 1.6 | 2.7 | 2.0 | putative starch degradation products transport system permease protein AmyD |
| CIBE_5692 | 8up | -0.7 | 1.7 | 2.5 | 2.3 | Glycosyl transferase                                                        |
| CIBE_2939 | 8up | -0.1 | 1.6 | 2.3 | 2.0 | D-galactose-binding protein                                                 |
| CIBE_3567 | 8up | 0.3  | 1.8 | 2.1 | 1.4 | Ni/Fe hydrogenase                                                           |
| CIBE_2039 | 8up | -1.1 | 1.7 | 2.6 | 2.5 | regulatory membrane-associated serine protease                              |
| CIBE_3924 | 8up | -0.2 | 1.5 | 2.4 | 2.0 | Methyltransferase type 11                                                   |
| CIBE_0742 | 8up | 0.1  | 1.8 | 2.2 | 1.6 | conserved protein of unknown function                                       |
| CIBE_3256 | 8up | 0.1  | 1.8 | 2.1 | 1.7 | Sugar transporter                                                           |
| CIBE_1500 | 8up | -0.5 | 1.2 | 3.1 | 2.0 | Ferredoxin                                                                  |
| CIBE_2196 | 8up | -0.9 | 1.1 | 2.8 | 2.7 | Pyruvate-flavodoxin oxidoreductase                                          |
| CIBE_5643 | 8up | 0.0  | 1.8 | 2.3 | 1.6 | Glycosyl transferase, group 1                                               |
| CIBE_4055 | 8up | -1.1 | 1.5 | 2.6 | 2.7 | putative galactoside ABC transporter                                        |
| CIBE_2661 | 8up | -0.1 | 2.6 | 2.0 | 1.1 | protein of unknown function                                                 |
| CIBE_1667 | 8up | -0.9 | 1.4 | 2.9 | 2.2 | ABC transporter substrate-binding protein                                   |
| CIBE_4880 | 8up | -0.6 | 1.4 | 2.7 | 2.2 | Pyruvate flavodoxin/ferredoxin oxidoreductase domain protein                |
| CIBE_0641 | 8up | -0.6 | 0.7 | 3.0 | 2.4 | Small, acid-soluble spore protein 1                                         |
| CIBE_0047 | 8up | 0.0  | 1.9 | 2.0 | 1.4 | conserved protein of unknown function                                       |
| CIBE_0738 | 8up | -0.1 | 1.3 | 2.3 | 1.8 | conserved protein of unknown function                                       |
| CIBE_1081 | 8up | -1.4 | 1.5 | 2.7 | 2.4 | conserved exported protein of unknown function                              |
| CIBE_4034 | 8up | -0.4 | 2.1 | 2.3 | 1.3 | conserved membrane protein of unknown function                              |
| CIBE_0740 | 8up | -0.2 | 1.5 | 2.2 | 1.8 | Rubrerythrin                                                                |
| CIBE_5000 | 8up | 0.2  | 1.7 | 2.2 | 1.1 | conserved protein of unknown function                                       |
| CIBE_0773 | 8up | -0.1 | 1.6 | 2.4 | 1.4 | conserved protein of unknown function                                       |
| CIBE_4879 | 8up | -0.5 | 1.4 | 2.4 | 1.9 | Pyruvate ferredoxin/flavodoxin oxidoreductase, beta subunit                 |
| CIBE_1807 | 8up | -0.2 | 1.2 | 2.2 | 1.9 | Sporulation protein                                                         |
| CIBE_0231 | 8up | -0.6 | 1.3 | 2.5 | 1.9 | conserved protein of unknown function                                       |
| CIBE_2101 | 8up | 0.1  | 1.6 | 2.0 | 1.3 | Lactate utilization protein B/C                                             |
| CIBE_3953 | 8up | -0.1 | 1.9 | 1.6 | 1.6 | conserved exported protein of unknown function                              |
| CIBE_0739 | 8up | -0.2 | 1.3 | 2.2 | 1.6 | Stage V sporulation protein R                                               |
| CIBE_5688 | 8up | -0.9 | 0.4 | 2.4 | 3.0 | conserved protein of unknown function                                       |
| CIBE_5774 | 8up | -0.7 | 1.1 | 3.0 | 1.5 | putative manganese catalase                                                 |
| CIBE_3314 | 8up | 0.0  | 1.5 | 2.0 | 1.4 | conserved protein of unknown function                                       |
| CIBE_0737 | 8up | -0.4 | 1.2 | 2.3 | 1.7 | serine protein kinase                                                       |
| CIBE_2348 | 8up | -1.7 | 1.6 | 3.1 | 1.8 | conserved protein of unknown function                                       |
| CIBE_2879 | 8up | -0.5 | 1.0 | 2.2 | 2.0 | Cytochrome b5                                                               |
| CIBE_5642 | 8up | -0.7 | 1.7 | 1.7 | 1.8 | Polysaccharide biosynthesis protein                                         |
| CIBE_2769 | 8up | -0.3 | 1.6 | 2.0 | 1.3 | conserved protein of unknown function                                       |
| CIBE_4807 | 8up | -0.3 | 1.6 | 1.7 | 1.6 | exported protein of unknown function                                        |
| CIBE_0538 | 8up | -0.3 | 1.3 | 1.7 | 1.8 | sporulation-specific protease                                               |
| CIBE_2224 | 8up | -0.1 | 0.3 | 2.1 | 2.2 | conserved protein of unknown function                                       |
| CIBE_1771 | 8up | 0.0  | 1.9 | 1.6 | 0.8 | Membrane protein                                                            |
| CIBE_4865 | 8up | -1.9 | 1.8 | 2.3 | 2.2 | Glycosyl transferase                                                        |
| CIBE_5903 | 8up | -0.9 | 1.5 | 2.4 | 1.4 | conserved protein of unknown function                                       |
| CIBE_1043 | 8up | -0.2 | 1.4 | 1.8 | 1.3 | Peptidase S8 and S53, subtilisin, kexin, sedolisin                          |
| CIBE_3965 | 8up | -0.6 | 0.7 | 2.4 | 1.7 | Spore protein                                                               |
| CIBE_4722 | 8up | -0.5 | 0.6 | 2.6 | 1.6 | putative galactoside ABC transporter                                        |
| CIBE_5648 | 8up | -0.5 | 1.3 | 1.7 | 1.8 | Glycosyl transferase family 1                                               |
| CIBE_1232 | 8up | -0.8 | 1.0 | 2.2 | 1.9 | Calcium-transporting ATPase 1                                               |
| CIBE_2198 | 8up | -0.3 | 2.4 | 1.7 | 0.3 | protein of unknown function                                                 |

|             |              |      |      |      |      |      |                                                                              |
|-------------|--------------|------|------|------|------|------|------------------------------------------------------------------------------|
| CIBE_3011   | 8up          | -0.6 | 1.0  | 2.4  | 1.3  | -    | conserved exported protein of unknown function                               |
| CIBE_3600   | 8up          | -0.3 | 1.4  | 1.8  | 1.3  | fda  | Fructose-bisphosphate aldolase class 1                                       |
| CIBE_0206   | 8up          | -0.8 | 0.8  | 2.0  | 1.9  | -    | N-acetylmuramoyl-L-alanine amidase CWID                                      |
| CIBE_3070   | 8up          | -0.5 | 0.5  | 2.2  | 1.7  | -    | Serine acetyltransferase-related protein                                     |
| CIBE_3462   | 8up          | -0.1 | 1.5  | 1.3  | 1.1  | -    | Sodium:proton antiporter                                                     |
| CIBE_2293   | 8up          | 0.0  | 0.1  | 1.7  | 1.9  | -    | FAD-dependent oxidoreductase                                                 |
| CIBE_0419   | 8up          | -0.3 | 1.4  | 1.4  | 1.1  | nfsB | NAD(P)H-flavin oxidoreductase (nitroreductase)                               |
| CIBE_3541   | 8up          | 0.1  | 0.1  | 1.6  | 1.8  | yrkC | putative dioxygenase; cupin family                                           |
| CIBE_2065   | 8up          | -0.7 | 1.3  | 2.0  | 0.9  | azoR | FMN-dependent NADH-azoreductase                                              |
| CIBE_4640   | 8up          | -0.1 | 1.8  | 1.1  | 0.7  | -    | conserved protein of unknown function                                        |
| CIBE_0807   | 8up          | -1.1 | 1.1  | 2.6  | 1.0  | -    | conserved protein of unknown function                                        |
| CIBE_1557   | 8up          | -0.4 | 1.7  | 1.5  | 0.5  | -    | conserved protein of unknown function                                        |
| CIBE_4641   | 8up          | -0.1 | 2.2  | 0.7  | 0.6  | yvrH | two-component response regulator YvrH involved in cell wall processes [YvrG] |
| CIBE_5966   | 8up          | 0.0  | 1.6  | 1.3  | 0.5  | -    | conserved protein of unknown function                                        |
| CIBE_0428   | 8up          | -0.6 | 1.0  | 1.9  | 1.0  | -    | conserved protein of unknown function                                        |
| CIBE_5684   | 8up          | -0.7 | 0.2  | 2.3  | 1.5  | -    | conserved protein of unknown function                                        |
| CIBE_3428   | 8up          | -0.2 | 1.5  | 1.5  | 0.5  | -    | conserved protein of unknown function                                        |
| CIBE_3620   | 8up          | -0.7 | 1.2  | 1.6  | 0.9  | -    | Uncharacterized NAD(P)H oxidoreductase HI_1544                               |
| CIBE_0581   | 8up          | -0.8 | 1.2  | 1.8  | 0.8  | -    | conserved protein of unknown function                                        |
| CIBE_2121   | 8up          | -1.0 | 0.7  | 2.1  | 1.1  | -    | conserved membrane protein of unknown function                               |
| CIBE_3649   | 8up          | -1.2 | 0.5  | 1.8  | 1.8  | -    | Small acid-soluble spore protein, alpha/beta type                            |
| CIBE_0042   | 8up          | 0.0  | 1.9  | 0.8  | 0.3  | -    | conserved membrane protein of unknown function                               |
| CIBE_1741   | 8up          | -0.5 | 0.1  | 1.6  | 1.8  | -    | conserved protein of unknown function                                        |
| CIBE_0040   | 8up          | -0.5 | 0.0  | 1.7  | 1.8  | -    | Peptidoglycan-binding domain 1 protein                                       |
| CIBE_1558   | 8up          | -0.3 | 1.6  | 1.3  | 0.4  | -    | Lysophospholipase                                                            |
| CIBE_3057   | 8up          | -0.8 | -0.1 | 1.6  | 2.0  | -    | Glycosyl transferase, family 2                                               |
| CIBE_0672   | 8up          | -0.2 | 1.5  | 0.9  | 0.5  | -    | Peptidase M50                                                                |
| CIBE_1544   | 8up          | -0.9 | 0.9  | 1.4  | 1.1  | -    | Lipase                                                                       |
| CIBE_5092   | 8up          | -0.5 | 1.1  | 1.2  | 0.8  | -    | Sporulation protein YunB                                                     |
| CIBE_0547   | 8up          | -0.8 | 0.8  | 1.3  | 1.2  | ispE | 4-(cytidine 5'-diphospho)-2-C-methyl-D-erythritol kinase                     |
| CIBE_0754   | 8up          | -0.2 | 1.4  | 1.0  | 0.2  | mntP | putative manganese efflux pump MntP                                          |
| CIBE_1646   | 8up          | -0.4 | 1.2  | 1.1  | 0.5  | -    | Permease                                                                     |
| CIBE_1682   | 8up          | -0.7 | 0.9  | 1.2  | 0.7  | -    | Peptidase S8 and S53, subtilisin, kexin, sedolisin                           |
| CIBE_5685   | 8up          | -1.4 | 0.0  | 2.2  | 1.1  | -    | conserved protein of unknown function                                        |
| CIBE_2775   | 8up          | -1.3 | 0.3  | 1.7  | 1.3  | -    | Small, acid-soluble spore protein beta                                       |
| CIBE_4959   | 8up          | -0.6 | 1.2  | 1.2  | 0.2  | mntR | Transcriptional regulator MntR                                               |
| CIBE_3698   | 8up          | -0.8 | -0.1 | 1.7  | 0.8  | -    | Small acid-soluble spore protein, alpha/beta type                            |
| CIBE_0673   | 8up          | -0.4 | 1.3  | 0.5  | -0.1 | -    | conserved protein of unknown function                                        |
| CIBE_2216   | 8up          | -0.4 | 1.2  | 1.3  | -0.9 | -    | conserved protein of unknown function                                        |
| CIBE_5060   | 8up          | -0.9 | 1.1  | 0.8  | 0.2  | -    | Abortive infection protein                                                   |
| CIBE_2258   | 8down        | -0.7 | -0.5 | -2.3 | -2.6 | -    | conserved protein of unknown function                                        |
| CIBE_4352   | 8down        | 0.1  | -2.0 | -2.1 | -2.8 | -    | Pyruvate flavodoxin/ferredoxin oxidoreductase domain protein                 |
| CIBE_5053   | 8down        | 0.6  | -1.3 | -1.9 | -4.3 | -    | Ferrous iron transport protein B                                             |
| CIBE_5055   | 8down        | 0.4  | -1.6 | -1.5 | -4.9 | -    | FeoA family protein                                                          |
| CIBE_5054   | 8down        | 0.4  | -2.1 | -1.8 | -4.7 | -    | FeoA family protein                                                          |
| CIBE_1056   | 11up         | -0.9 | -0.3 | 1.8  | 2.3  | yhxC | putative oxidoreductase                                                      |
| CIBE_2329   | 11up         | -0.8 | -0.2 | 1.7  | 2.1  | -    | conserved protein of unknown function                                        |
| CIBE_4882   | 11up         | -0.5 | -0.2 | 1.6  | 1.7  | -    | Metallophosphoesterase                                                       |
| CIBE_1066   | 11up         | -0.5 | -0.5 | 1.4  | 1.9  | -    | putative ABC transporter, periplasmic-binding                                |
| CIBE_5950   | 11up         | -1.0 | -0.2 | 1.7  | 1.6  | -    | conserved protein of unknown function                                        |
| CIBE_0536   | 11up         | -0.9 | -0.3 | 1.3  | 1.4  | -    | Glycosyl transferase, group 1                                                |
| CIBE_0532   | 11up         | -1.4 | -0.5 | 1.5  | 1.9  | -    | Glycosyl transferase, group 1                                                |
| CIBE_5516   | 11up         | -1.0 | -0.3 | 2.1  | 0.6  | tip  | Protein Tip homolog                                                          |
| CIBE_0533   | 11up         | -1.0 | -0.5 | 1.5  | 1.4  | -    | Spore coat protein                                                           |
| CIBE_4006   | 11up         | -1.1 | -0.6 | 1.5  | 1.6  | -    | conserved protein of unknown function                                        |
| CIBE_4742   | 11up         | -1.1 | -0.8 | 1.4  | 1.5  | yisY | AB hydrolase superfamily protein YisY                                        |
| CIBE_3050   | 11up         | -1.5 | -0.6 | 1.0  | 1.9  | fdtB | dTDP-3-amino-3,6-dideoxy-alpha-D-galactopyranose transaminase                |
| CIBE_0736   | 11up         | -1.5 | -0.4 | 1.3  | 0.9  | -    | conserved protein of unknown function                                        |
| CIBE_3951   | 11up         | -1.2 | -0.8 | 1.4  | 0.7  | -    | Spore protein                                                                |
| CIBE_2913   | 11up         | -1.7 | -0.2 | 1.2  | 0.7  | -    | Small, acid-soluble spore protein beta                                       |
| CIBE_1674   | 11up         | -1.3 | -0.9 | 1.2  | 0.3  | -    | Small, acid-soluble spore protein beta                                       |
| CIBE_3604   | 11up         | -2.6 | -1.5 | 1.3  | 1.5  | -    | Ferrous iron transport protein B homolog (fragment)                          |
| CIBE_tRNA28 | 11up         | -1.7 | -0.9 | 0.1  | 0.6  | -    | Gly tRNA                                                                     |
| CIBE_4841   | 11up         | -1.6 | -0.8 | 0.1  | 0.0  | buk  | branched-chain fatty-acid kinase                                             |
| CIBE_3605   | 11up         | -3.0 | -1.7 | 0.6  | 1.0  | -    | Ferrous iron transport protein B homolog (fragment)                          |
| CIBE_3603   | 11up         | -2.9 | -1.7 | 0.2  | 1.0  | -    | Iron transporter FeoA                                                        |
| CIBE_4869   | 11up         | -1.5 | -2.5 | 0.2  | -0.4 | -    | Beta-ketoacyl-acyl-carrier-protein synthase I                                |
| CIBE_4341   | Unclassified | 4.7  | 3.0  | 1.9  | 2.1  | -    | Sugar-binding protein                                                        |
| CIBE_3250   | Unclassified | 4.2  | 2.5  | 1.5  | 2.3  | -    | conserved protein of unknown function                                        |
| CIBE_3258   | Unclassified | -1.6 | 2.4  | 4.7  | 3.9  | -    | PTS maltose transporter subunit IIBC                                         |
| CIBE_3259   | Unclassified | -2.1 | 1.6  | 4.4  | 3.8  | -    | putative PTS IIA-like nitrogen-regulatory protein PtsN                       |
| CIBE_0988   | Unclassified | 0.1  | 1.7  | 0.5  | -0.8 | -    | TspO                                                                         |
| CIBE_0920   | Unclassified | -0.5 | 1.3  | 0.3  | -0.2 | -    | conserved protein of unknown function                                        |
| CIBE_0080   | Unclassified | -0.8 | 1.0  | 0.3  | 0.3  | ykoT | putative glycosyltransferase                                                 |
| CIBE_5443   | Unclassified | -1.0 | 0.9  | 0.3  | -0.3 | -    | Transcription antiterminator BglG                                            |
| CIBE_0107   | Unclassified | 1.1  | 0.8  | -1.0 | -1.3 | -    | Sporulation protein                                                          |
| CIBE_0308   | Unclassified | 1.5  | -0.3 | -0.7 | -0.8 | -    | Signal transduction histidine kinase regulating citrate/malate metabolism    |
| CIBE_5197   | Unclassified | 0.7  | 0.9  | -1.1 | -1.6 | -    | conserved exported protein of unknown function                               |
| CIBE_0919   | Unclassified | -0.8 | 1.4  | -0.6 | -1.3 | -    | protein of unknown function                                                  |
| CIBE_2260   | Unclassified | 0.0  | 0.2  | -1.5 | -1.4 | -    | conserved protein of unknown function                                        |
| CIBE_2839   | Unclassified | 0.2  | 0.6  | -2.1 | -1.7 | -    | protein of unknown function                                                  |
| CIBE_2277   | Unclassified | -0.3 | 0.1  | -1.6 | -1.2 | xkdU | putative phage protein XkdU                                                  |
| CIBE_0350   | Unclassified | -4.1 | -4.7 | -1.5 | -1.4 | guaB | inosine-monophosphate dehydrogenase                                          |
| CIBE_2740   | Unclassified | -1.2 | -3.2 | -4.6 | -5.0 | treA | trehalose-6-phosphate hydrolase                                              |
| CIBE_2739   | Unclassified | -1.0 | -3.4 | -5.3 | -5.1 | treP | phosphotransferase system (PTS) trehalose-specific enzyme IIBC component     |
| CIBE_0034   | Unclassified | -3.2 | -4.6 | -6.5 | -4.5 | -    | conserved protein of unknown function                                        |
